# Supplementary material for: Integrated Multidimensional Sustainability Assessment of Energy System Transformation Pathways
Source: MDPI journal article supplement (doi:10.3390/su13095217), 2021-05-07
Supplement: s1 [file s1]

# Integrated multidimensional sustainability assessment of energy system transformation pathways – Supplementary Material

Tobias Naegler, Lisa Becker, Jens Buchgeister, Wolfgang Hauser, Heidi Hottenroth, Tobias Junne, Ulrike Lehr, Oliver Scheel, Ricarda Schmidt-Scheele, Sonja Simon, Claudia Sutardhio, Ingela Tietze, Philip Ulrich, Tobias Viere, and Anke Weidlich

## 1. List of all analysed studies and scenarios.

Table 1: Overview of all scenario studies taken into account during the scenario selection process

| Authors / Institutions                        | Commissioned by             | Title                                                                                                                                                           | Year | Scenario Variants                                                                                                                                                                                            |
|-----------------------------------------------|-----------------------------|-----------------------------------------------------------------------------------------------------------------------------------------------------------------|------|--------------------------------------------------------------------------------------------------------------------------------------------------------------------------------------------------------------|
| DLR, FhG IWES, IfnE                           | BMU                         | Langfristszenarien und Strategien für den Ausbau der erneuerbaren Energien in Deutschland                                                                       | 2012 | BMU12-A<br>BMU12-B<br>BMU12-C<br>BMU12-THG95                                                                                                                                                                 |
|                                               | UBA                         | Treibhausgasneutrales Deutschland im Jahr 2050                                                                                                                  | 2013 | UBA13-THGND                                                                                                                                                                                                  |
| EWI, GWS, Prognos,                            | BMWi                        | Entwicklung der Energiemärkte – Energiereferenzprognose                                                                                                         | 2014 | BMWi14-REF<br>BMWi14-ZIEL                                                                                                                                                                                    |
| J. Nitsch                                     | BEE                         | GROKO II – Szenarien der deutschen Energieversorgung auf der Basis des EEG-Gesetzesentwurfs                                                                     | 2014 | NIT14-GROKO<br>NIT14-100                                                                                                                                                                                     |
| Öko-Institut, FhG ISI, H.-J. Ziesing          | BMUB                        | Klimaschutzszenario 2050                                                                                                                                        | 2015 | BMUB14-AMS<br>BMUB14-KSSz80<br>BMUB14-KSSz95                                                                                                                                                                 |
| Wuppertal Institut                            | SDSN/IDDRI                  | Pathways to deep decarbonisation in Germany                                                                                                                     | 2015 | SDSN/IDDRI15-T<br>SDSN/IDDRI15-E<br>SDSN/IDDRI15-90                                                                                                                                                          |
| FhG IWES, ifeu                                | BMWi                        | Interaktion EE-Strom, Wärme und Verkehr                                                                                                                         | 2015 | IWES/IFEU15-IntEEStrom                                                                                                                                                                                       |
| FhG ISE                                       |                             | Was kostet die Energiewende? Wege zur Transformation des deutschen Energiesystems bis 2050                                                                      | 2015 | ISE15 - 80-g-k-nb<br>ISE15 - 80-g-CH4-nb<br>ISE15 - 80-g-H2-nb<br>ISE15 - 80-g-el-nb<br>ISE15 - 80-g-mix-nb<br>ISE15 - 80-amb-mix-nb<br>ISE15 - 80-amb-mix-b<br>ISE15 - 85-amb-mix-b<br>ISE15 - 90-amb-mix-b |
| BET, Hamburg Institut, Greenpeace Deutschland | Greenpeace Deutschland      | Klimaschutz: Der Plan - Energiekonzept für Deutschland                                                                                                          | 2015 | GP15-PLAN                                                                                                                                                                                                    |
| J. Nitsch                                     | BEE                         | Die Energiewende nach COP 21 - Aktuelle Szenarien der deutschen Energieversorgung                                                                               | 2016 | NIT16-TREND<br>NIT16-KLIM50<br>NIT16-KLIM40                                                                                                                                                                  |
| J. Nitsch                                     |                             | Erfolgreiche Energiewende nur mit verbesserter Energieeffizienz und einem klimagerechten Energiemarkt - Aktuelle Szenarien 2017 der deutschen Energieversorgung | 2017 | NIT17-TREND<br>NIT17-MEFF<br>NIT17-HEFF                                                                                                                                                                      |
| ifeu, FhG IWES, CONSIDEO, Dr. Karl Schoer SSG | UBA                         | Den Weg zu einem treibhausgasneutralen Deutschland ressourcenschonend gestalten                                                                                 | 2017 | UBA17-GreenEe                                                                                                                                                                                                |
| enervis energy advisors GmbH                  | INES, BWE                   | Erneuerbare Gase – ein Systemupdate der Energiewende                                                                                                            | 2017 | INES-ME<br>INES-OS                                                                                                                                                                                           |
| FhG ISI, ifeu, Consentec                      | BMWi                        | Langfristszenarien für die Transformation des Energiesystems in Deutschland                                                                                     | 2017 | BMWi17-REF<br>BMWi17-Basis<br>BMWi17-gNetz<br>BMWi17-altEE<br>BMWi17-restarm                                                                                                                                 |
| Jacobson et al.                               |                             | 100% Clean and Renewable Wind, Water, and Sunlight All-Sector Energy Roadmaps for 139 Countries in the World                                                    | 2017 | JAC17-WWS                                                                                                                                                                                                    |
| DECHEMA et al.                                | Leopoldina, acatech, UddAdW | „Sektorkopplung“ – Untersuchungen und Überlegungen zur Entwicklung eines integrierten Energiesystems                                                            | 2017 | ESYS17                                                                                                                                                                                                       |
| BCG, Prognos                                  | BDI                         | Klimapfade für Deutschland                                                                                                                                      | 2018 | BDI18-REF<br>BDI18-80<br>BDI18-95                                                                                                                                                                            |
| dena, ewi Energy Research & Scenarios gGmbH   | dena                        | dena-Leitstudie - Integrierte Energiewende. Impulse für die Gestaltung des Energiesystems bis 2050                                                              | 2018 | dena18-REF<br>dena18-EL80<br>dena18-EL95<br>dena18-TM80<br>dena18-TM85                                                                                                                                       |
| GWS, Prognos, DIW, FhG ISI, DLR               | BMWi                        | Gesamtwirtschaftliche Effekte der Energiewende                                                                                                                  | 2018 | BMWi18-KF<br>BMWi18-EWS                                                                                                                                                                                      |

## 2. Documentation of selected harmonised re-modeled scenarios

Here we present some central results of the harmonised re-modeled scenarios. More details (energy balances, installed capacities,...) can be found on the project website: <https://www.innosys-projekt.de>

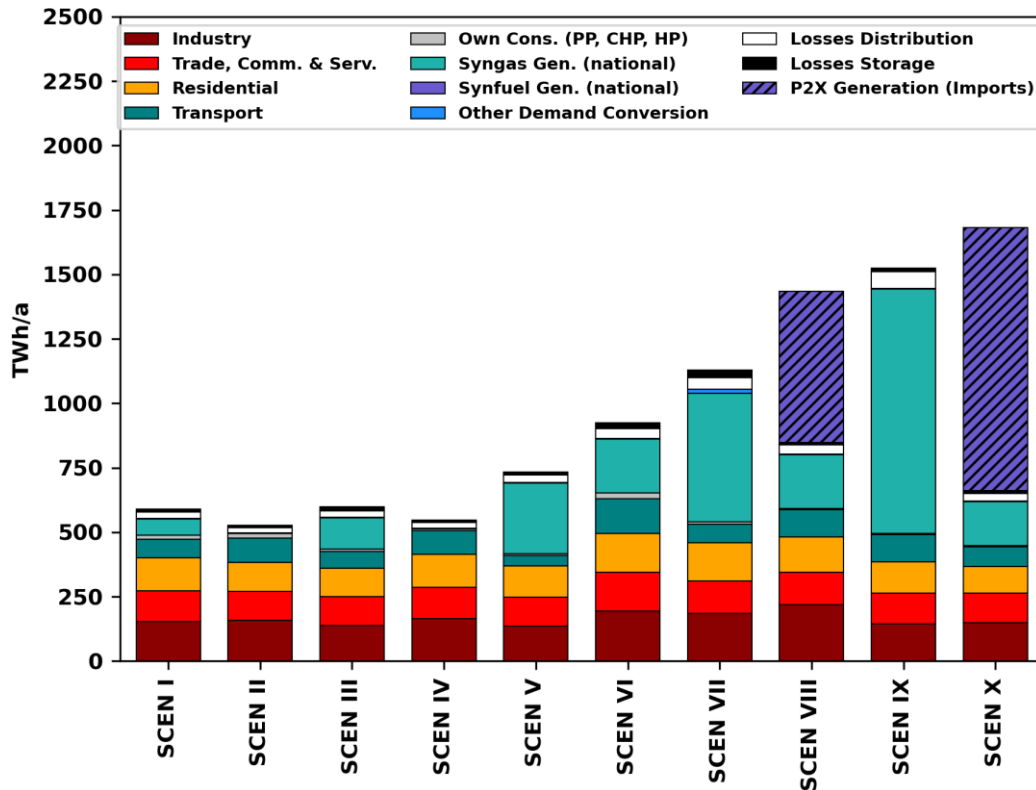

Figure 1: Power demand per sector (including power demand for P2X imports)

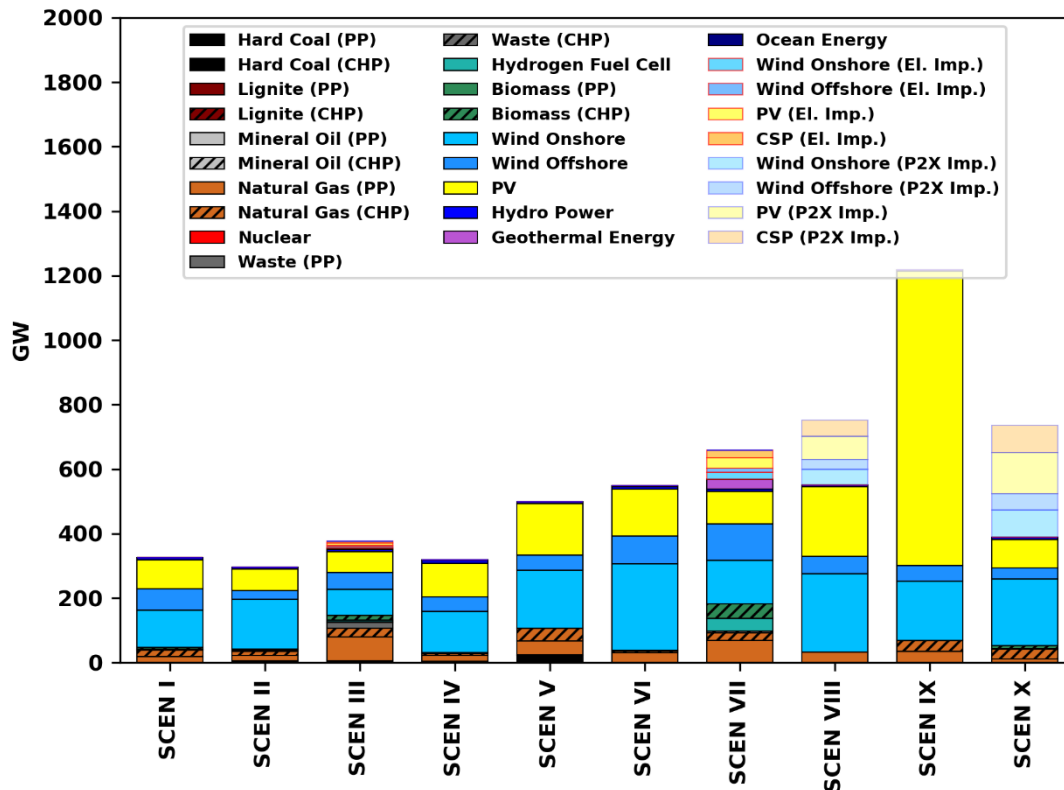

Figure 2: Installed capacity power generation in remodeled scenarios (including installed capacities for P2X imports)

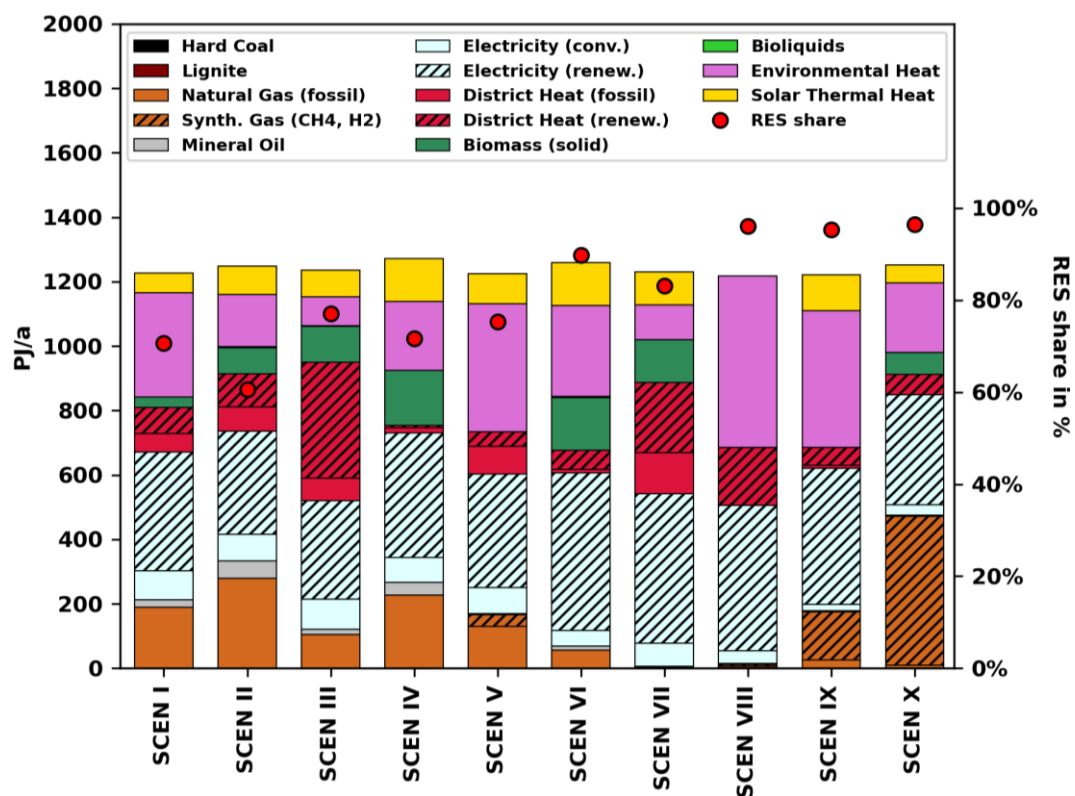

Figure 3: Final energy demand and resulting share in renewable energies in residential sector

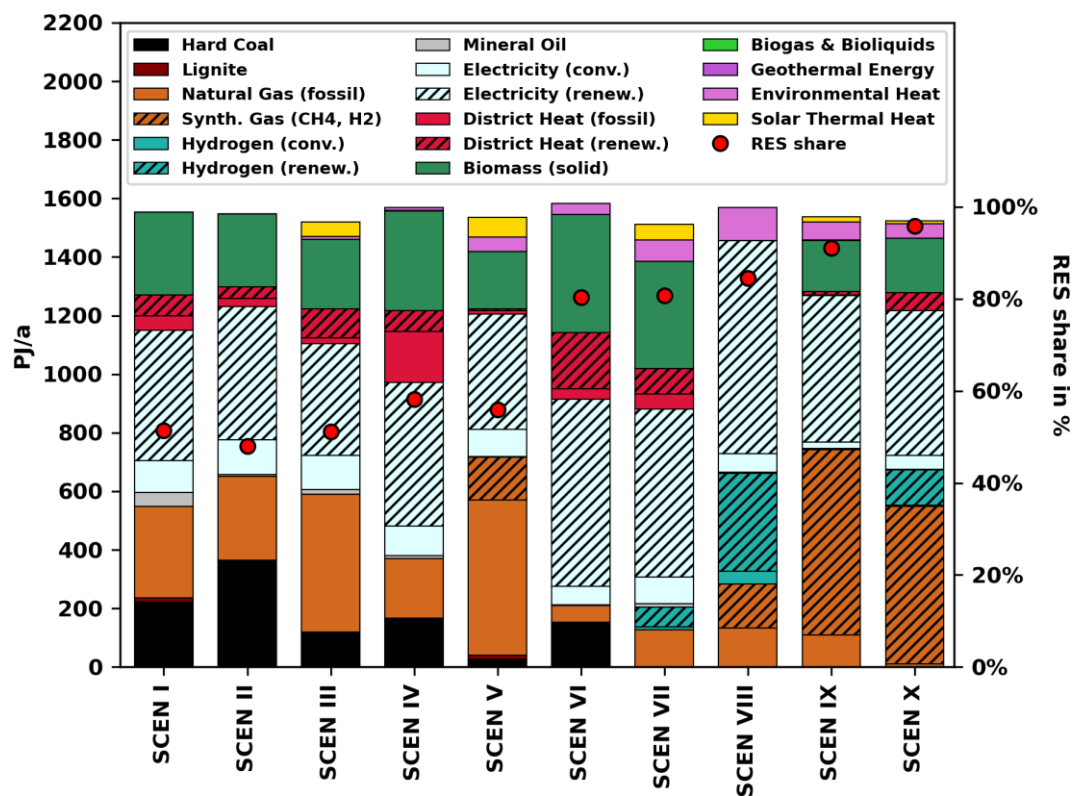

Figure 4: Final energy demand and resulting share in renewable energies in the industry sector

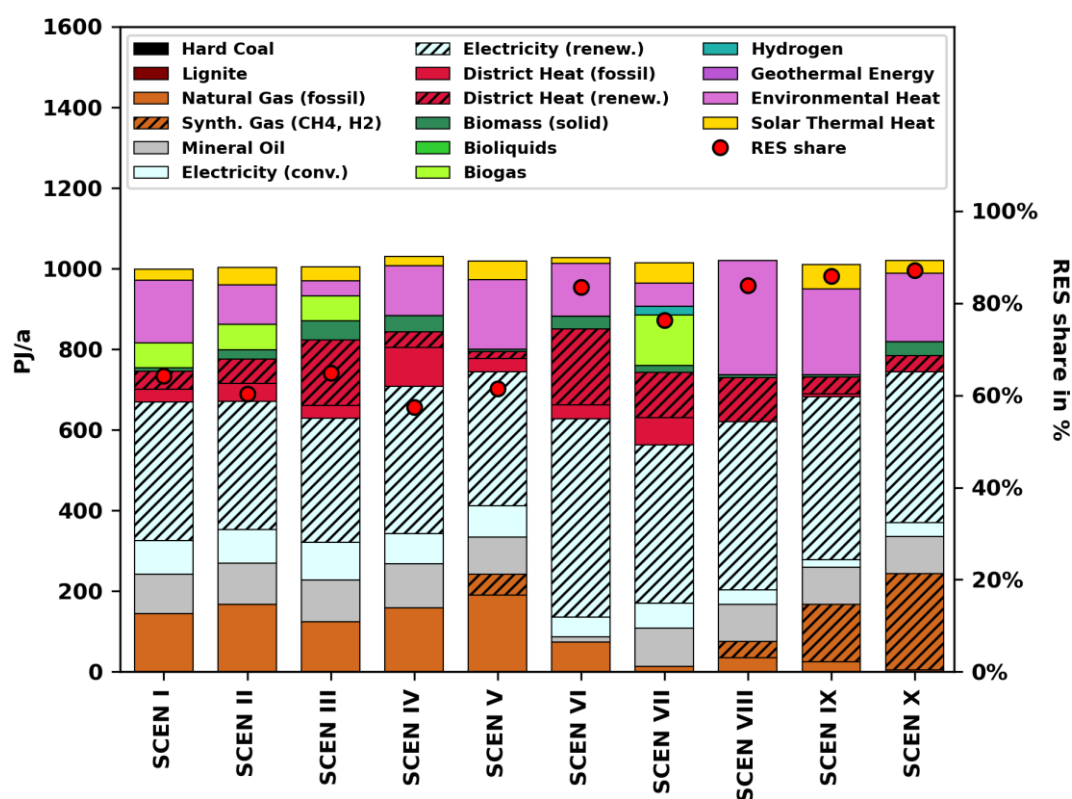

Figure 5: Final energy demand and resulting share in renewable energies in the sector trade, commerce, and services

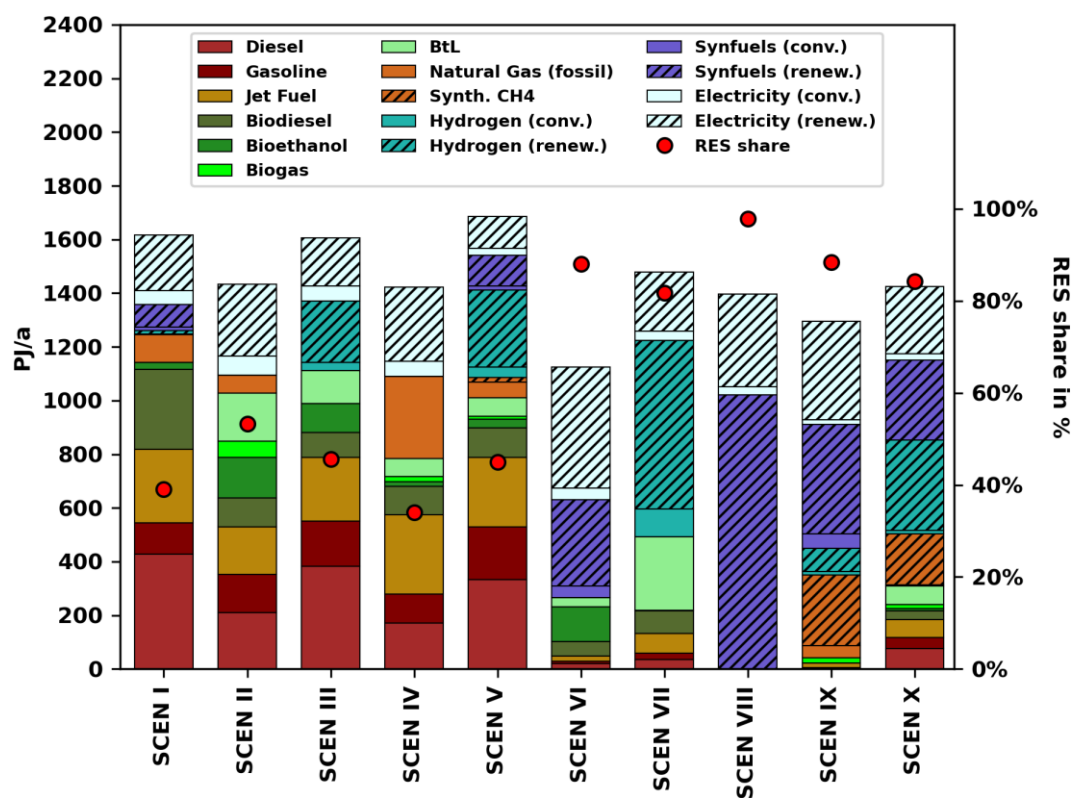

Figure 6: Final energy demand and resulting share in renewable energies in the transport sector

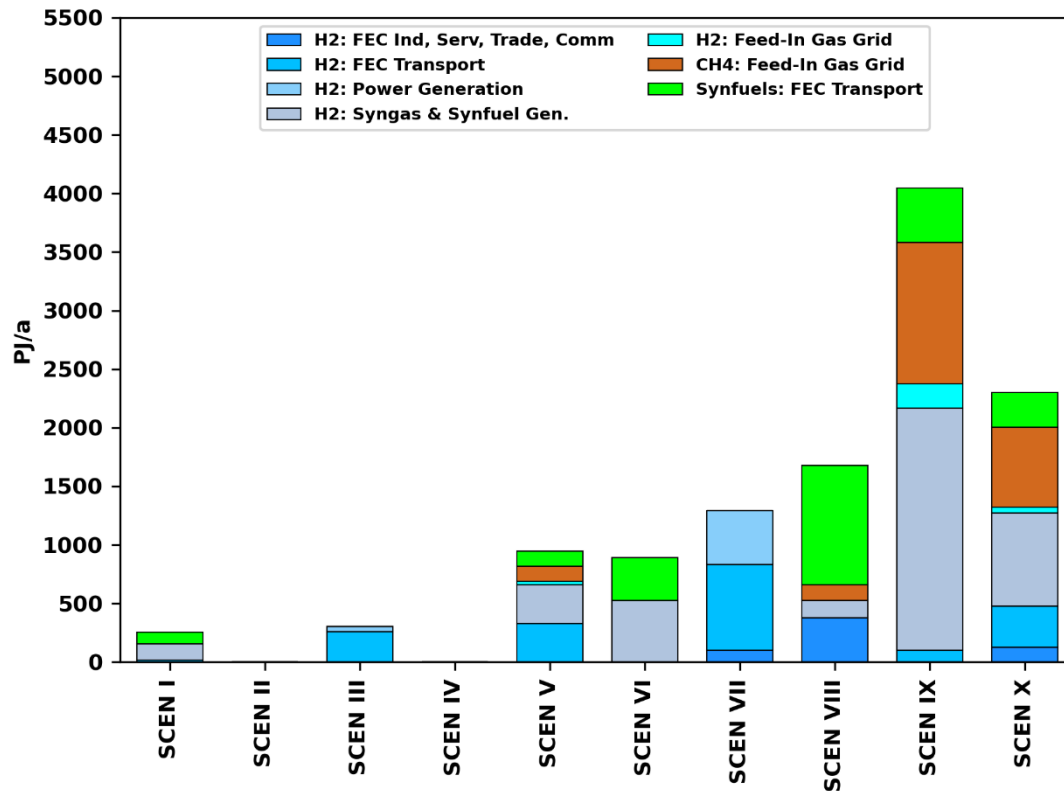

Figure 7: Consumption of synthetic gases (H<sub>2</sub>, CH<sub>4</sub>) and fuels

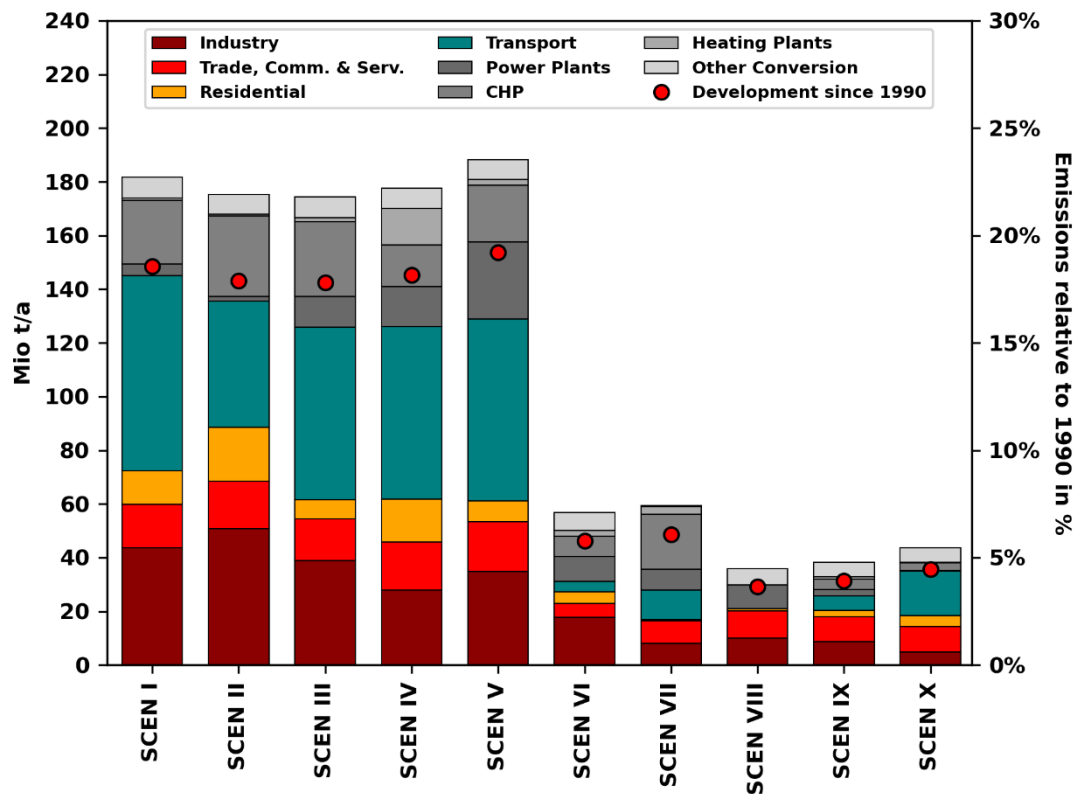

Figure 8: Direct, energy-related CO<sub>2</sub> emissions



### 3. Short description of the models

#### 3.1. MESAP

The harmonized re-modeling of the scenarios was done with the the decision support system Mesap/PlaNet (Modular Energy System Analysis and Planning Environment [1]). The Mesap/PlaNet model is an accounting framework that is used, among others, to develop normative scenarios for energy systems [2-6]. Scenario development with Mesap/PlaNet is based on background knowledge and exogenously defined premises considering detailed studies of issues such as the efficiency of demand sectors, future technologies and their implementation potentials, regulative interventions, and market developments and their effects. Therefore, experience and knowledge of the scenario developer is essential to the scenario building process, as he/she enjoys a certain degree of freedom when selecting model parameters. The model serves as a framework for integrating a wide variety of aspects of energy system transformation. It differs fundamentally from optimization models that apply a cost minimizing objective function. Resulting effects of the scenarios can be estimated, e.g., in terms of energy demand and supply structures, emissions, and energy costs. Energy model calibration was done using available statistical information such as official energy balances.

Because of its flexibility, MESAP is ideally suited to re-model scenarios from other studies.

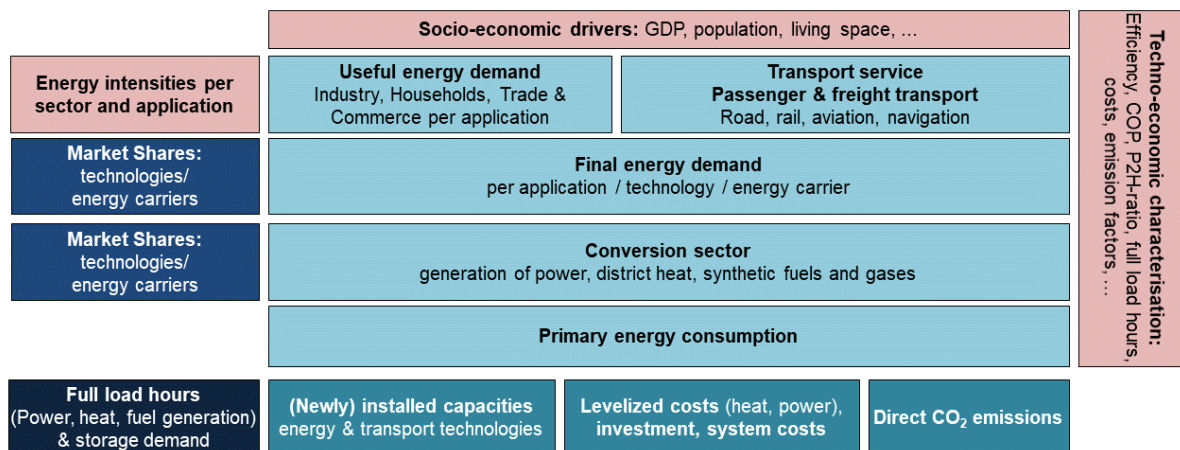

Figure 9: Schematic overview of the structure and workflow of MESAP. For details see main text.

In the InNOSys project, MESAP uses the following quantities as boundary conditions for all the re-modeled scenarios (red fields in Figure 9):

- Database with techno-economic characterization of energy and transport technologies (efficiencies, COP, power-to-heat ratios, invest & O&M costs, technical lifetime, ...)
- Socio-economic drivers (GDP, population) (taken from [7])
- Energy Intensities allow the calculation of useful energy demand for different applications (like space heat or process heat) in the different sectors as well transport services. (intensities: e.g. useful space heat demand per living space, useful process heat demand per gross value added) (based on [7])

The next step in the scenario development process is to set market shares for all relevant technologies in the final energy and conversion sectors (blue fields in Figure 9). This could be for example the market shares of different propulsion technologies in passenger cars, the market shares of wind onshore, wind offshore and PV in total power generation or the market shares of different technologies to provide space heat in the residential sector. These market shares are taken as far as possible from the original studies (see Table 1 in main document). Thus, the technical strategies to fulfill the useful energy demand and the transport services are inspired by the original scenario study.

MESAP then calculates the entire energy balances from useful energy and transport services over final energy demand to the primary energy consumption.

MESAP's temporal resolution is one year. In order to calculate installed capacities & number of cars, assumptions on full load hours and annual mileage of individual plants and vehicle types are required (dark blue field in Figure 9). Furthermore, MESAP is not capable of calculating power storage demand. In order to obtain estimates on full load hours of power generation plants and power storage demand, MESAP is coupled with flexABLE as described in the main manuscript. Full load hours for the generation of space heat and hot water are uniformly set to 1650 h/a. Full load hours for the generation of process heat are uniformly set to 3500 h/a. Full load hours for electrolyzers: 4000h/a, methanation: 8000h/a, P2L: 7900 h/a, biogas generation: 8760h/a, biofuel generation 4000 h/a. The annual mileage of cars is uniformly set to 17,250 pkm/a (on average 1.15 people per car, 15,000 km/a per car). The annual mileage of trucks is set in order to obtain realistic values for the number of trucks in Germany from [8] for the year 2017.

When full load hours and annual mileage are provided, MESAP calculates the installed capacities for power, heat, synfuel and biofuel generation, as well as the number of cars and trucks. Furthermore, annual new installations are calculated based on an age cohort approach.

### 3.2. flexABLE

flexABLE is an agent-based electricity market simulation model. The model follows a bottom-up approach and includes main types of generation assets such as conventional power plants, variable renewable generators, and storage units. These assets, represented by agents, can participate in both an energy exchange market (or energy-only market EOM) and a control reserve market (CRM). Additionally, eligible power plants capable of heat co-generation, such as coal and gas power plants, can participate in the regional district heating market (DHM). In the current implementation, the model operates at a quarter-hour resolution for all markets except for CRM, where the market clearing for the reserve capacity occurs on a four-hour basis.

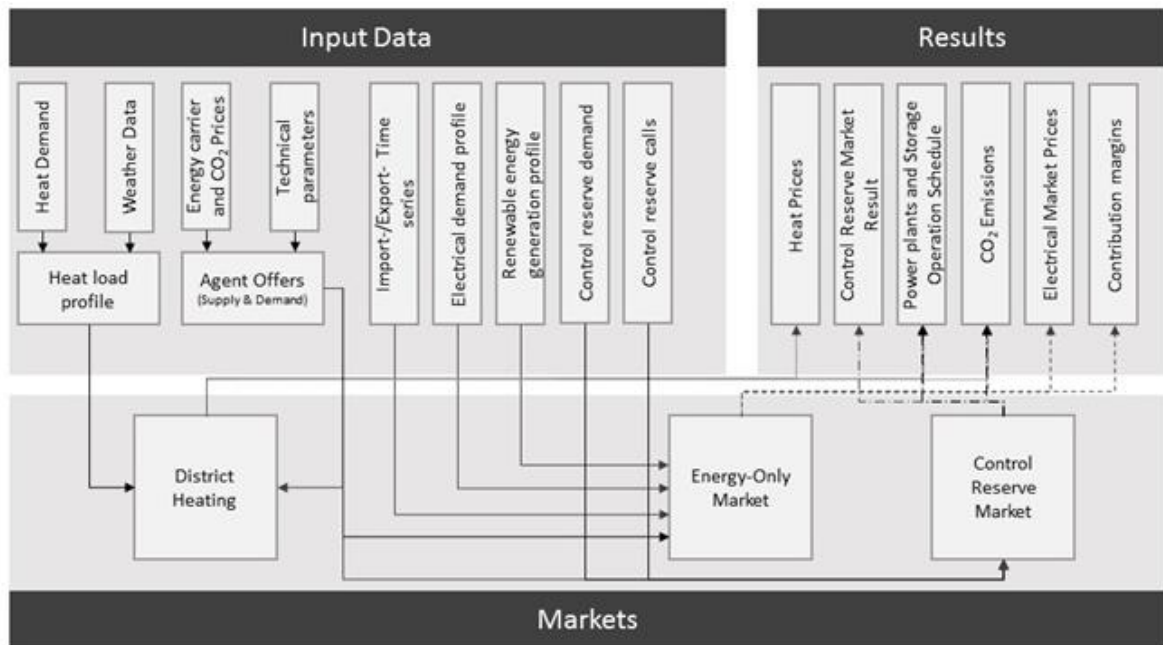

Figure 10: Overview of the Structure of flexABLE

A brief description of the simulation sequence is presented in the following. First, all eligible agents submit their bids on the CRM. In the current implementation, only conventional powerplants and storage units can participate in the CRM. Agents can submit CRM bids for both positive and negative reserve. Each bid includes the capacity, capacity price, and energy price. The submitted capacity price is used for the reserve capacity market clearing, and the energy price is used during the call for energy

market clearing. After the CRM clearing the agents receive feedback from the market. The feedback includes acceptance, partial acceptance, rejection, and call for energy if present. Second, eligible power plants submit their bids on regional district heating market and receive feedback after the market clearing. Third, agents formulate bids for the EOM based on several techno-economic parameters, such as marginal cost, shut-down cost, ramp-up or rump-down speed. After the EOM clearing happens, and the agents receive feedback about the market results. This procedure repeats for each time step during the simulation. As a result, this model allows for detailed simulation of single units' dispatch plans and the markets' outcomes. Details on the model can be found in [9].

### 3.3. PANTA RHEI

PANTA RHEI is an environmentally extended version of macroeconometric simulation and forecasting model INFORGE [10], developed for the macroeconomic evaluation of environmental protection measures and energy economic policy. To quantify these macroeconomic effects, the long-term structural change in economic development and environmental-economic interdependencies are modeled.

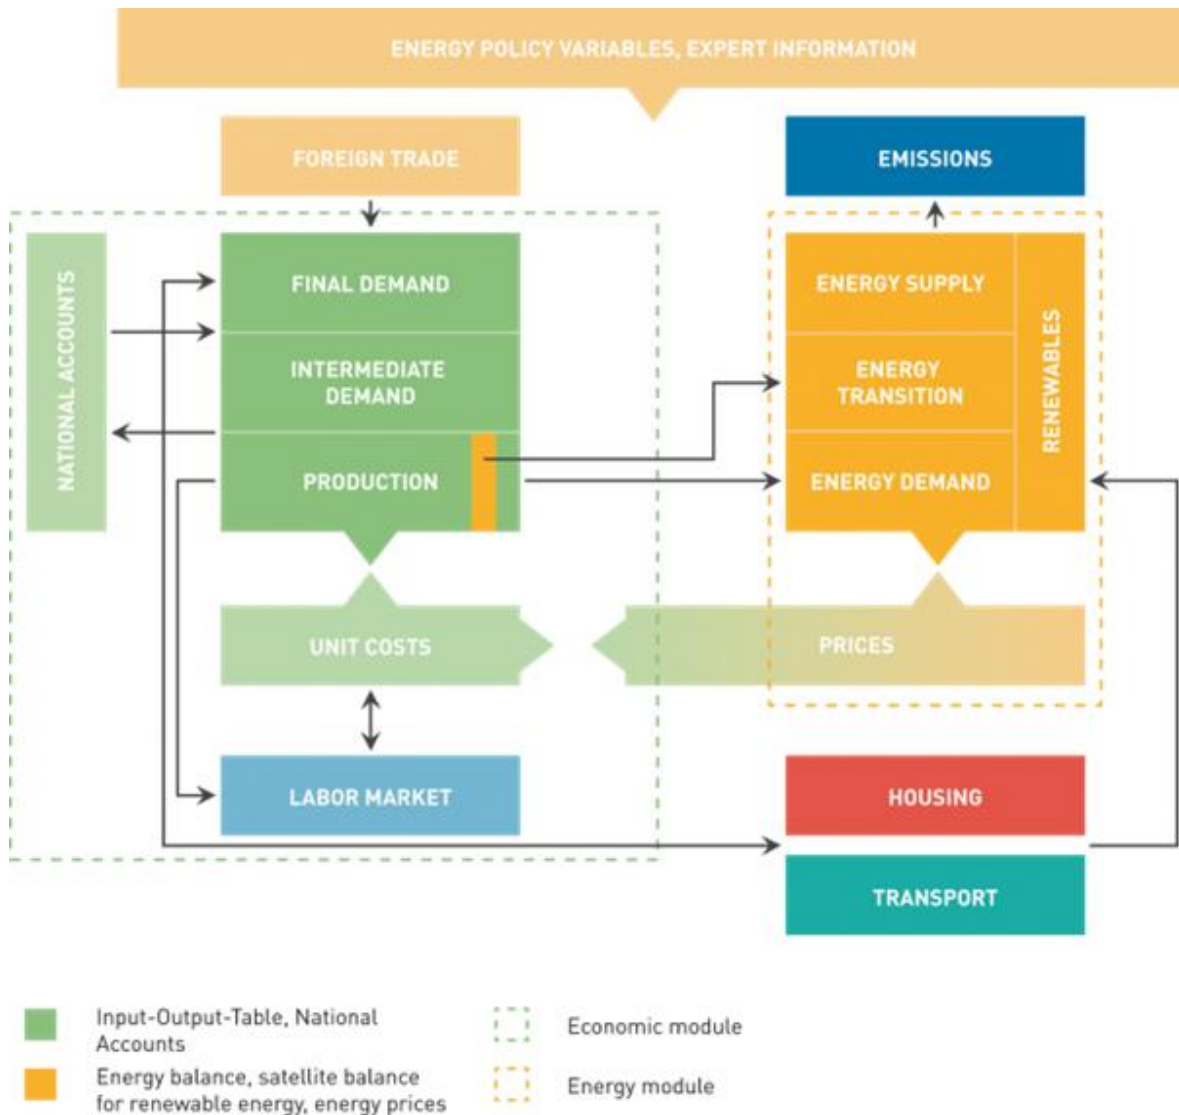

Figure 11: Overview of the PANTA RHEI model

The flow chart shown in Figure 10 provides an overview of the structure of the PANTA RHEI model. In addition to the comprehensive economic modelling, the sections of energy consumption and emissions as well as transport and housing are covered in detail. All model parts are consistently



linked to each other. For example, the transport sector models fuel consumption in litres, which, multiplied by the price per litre, feeds into input demand from the manufacturing sector and demand for consumer goods. Changes to fuel tax rates result in changes to tax receipts and a broad range of economic adaptation processes. However, changes in fuel prices also lead to changes in behaviour, which are also considered in PANTA RHEI. The model is solved with full interdependence, i.e., the impacts between all model variables are captured simultaneously.

The model contains a multitude of macroeconomic variables drawn from official statistics and provides disaggregated information on 63 economic sectors. Energy balances (including satellite balances for renewable energy) are fully integrated into the model. The behavioral parameters are econometrically estimated based on time series data.

The economic core model INFORGE is regularly used, among others, for long-term employment projections and simulations by the Institute for Employment Research and the Federal Institute for Vocational Education and Training [11, 12]. The model linkages are described in detail in [13]. The PANTA RHEI model has been used extensively in recent years, e.g., to evaluate the macroeconomic effects of the energy transition [7, 14] and to develop socio-economic scenarios [15] .

### 3.4. Framework for the Assessment of Environmental Impacts of Transformation Scenarios (FRITS)

Figure 12 gives an overview of structure of the FRITS framework. For more explanations please refer to the main manuscript. Details on FRITS can be found in [16].

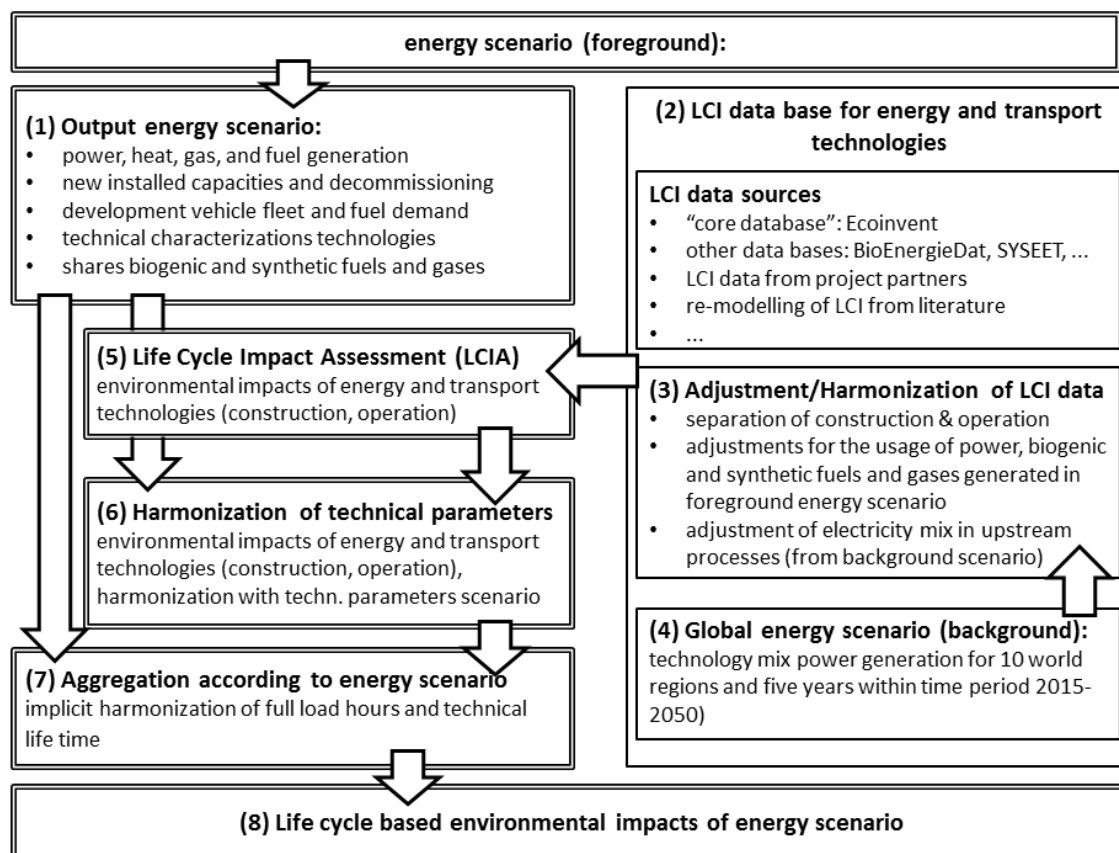

Figure 12: Overview of the workflow in FRITS (from [16])

#### 4. Documentation of approach for focus groups and conjoint analysis

This table shows how the seven basic technologies were bundled to pairs for the paired choice experiment in order to not compare a pair of only power generating technologies with one that generates power and domestic heat. For natural gas, two different sets of indicators were used – one of a typical power generating gas turbine (GAS-S), one of a domestic gas heating (GAS-W).

| All Combinations | Conjoint Option A |         | Versus | Conjoint Option B |         |
|------------------|-------------------|---------|--------|-------------------|---------|
| 1                | WIND              | PV      |        | WIND              | BATT    |
| 2                | WIND              | PV      |        | WIND              | GeoT    |
| 3                | WIND              | PV      |        | PV                | BATT    |
| 4                | WIND              | PV      |        | PV                | GeoT    |
| 5                | WIND              | PV      |        | GAS - S           | GeoT    |
| 6                | WIND              | BATT    |        | WIND              | GeoT    |
| 7                | WIND              | BATT    |        | PV                | BATT    |
| 8                | WIND              | BATT    |        | PV                | GeoT    |
| 9                | WIND              | BATT    |        | GAS - S           | GeoT    |
| 10               | WIND              | GeoT    |        | PV                | BATT    |
| 11               | WIND              | GeoT    |        | PV                | GeoT    |
| 12               | WIND              | GeoT    |        | GAS - S           | GeoT    |
| 13               | PV                | BATT    |        | PV                | GeoT    |
| 14               | PV                | BATT    |        | GAS - S           | GeoT    |
| 15               | PV                | GeoT    |        | GAS - S           | GeoT    |
| 16               | WIND              | GAS - W |        | WIND              | W-Pumpe |
| 17               | WIND              | GAS - W |        | WIND              | P2G     |
| 18               | WIND              | GAS - W |        | PV                | GAS - W |
| 19               | WIND              | GAS - W |        | PV                | W-Pumpe |
| 20               | WIND              | GAS - W |        | PV                | P2G     |
| 21               | WIND              | W-Pumpe |        | WIND              | P2G     |
| 22               | WIND              | W-Pumpe |        | PV                | GAS - W |
| 23               | WIND              | W-Pumpe |        | PV                | W-Pumpe |
| 24               | WIND              | W-Pumpe |        | PV                | P2G     |
| 25               | WIND              | P2G     |        | PV                | GAS - W |
| 26               | WIND              | P2G     |        | PV                | W-Pumpe |
| 27               | WIND              | P2G     |        | PV                | P2G     |
| 28               | PV                | GAS - W |        | PV                | W-Pumpe |
| 29               | PV                | GAS - W |        | PV                | P2G     |
| 30               | PV                | W-Pumpe |        | PV                | P2G     |

Figure 13: Technology pairs for paired choice experiment

Every person got one of four different sets of six decisions among decisions numbered 1 to 15 and six from among the decisions numbered 16 to 30. The sets were chosen so that every subsample of the focus groups was presented an evenly distributed technology pairs and decisions to create an even distributed decision table with at least 50 decisions per cell for stability of statistical calculations.

## 5. Workflow for the WSM (weighted sum model)

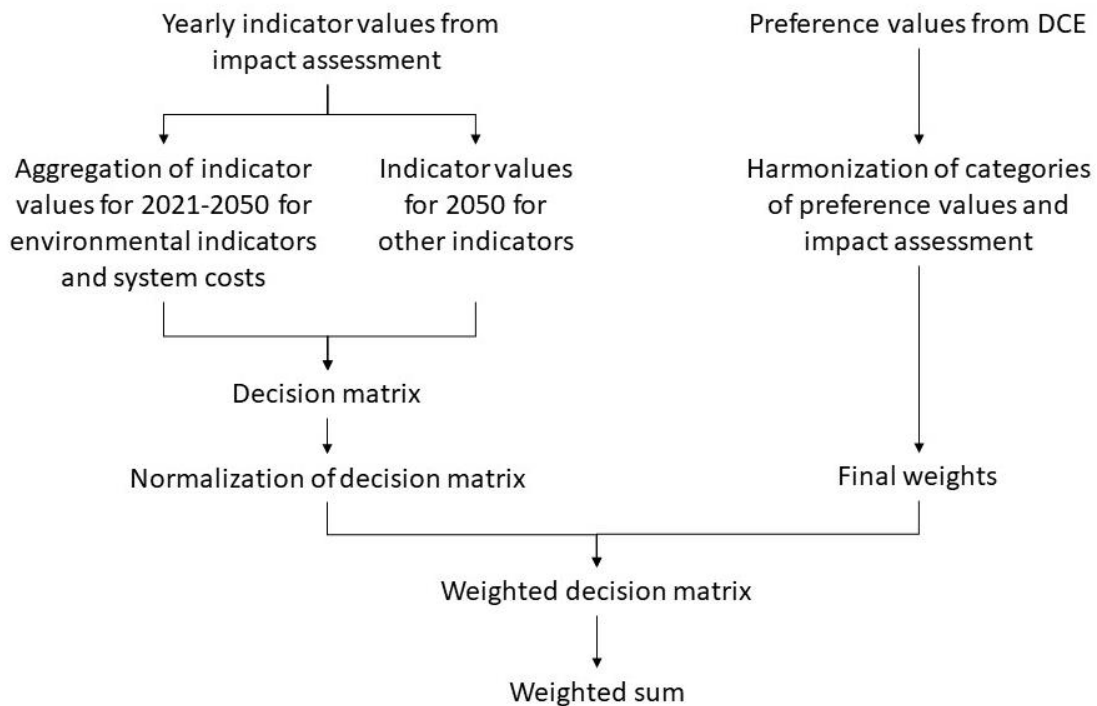

Figure 14: Workflow for the integration of indicator values from impact assessment and preference values from DCE in the MCDA (weighted sum model/WSM)

## 6. Selection of sustainability indicators

For the selection of the relevant and significant sustainability indicators an intensive literature research analysis was conducted. The analysis was systematised on the basis of the following procedure. First, literature was consulted that reflects the international and national discussion in Germany of sustainability or sustainable development in a political and scientific context in order to develop guidelines and frameworks for an sustainability assessment. Then the search was concentrated on literature which handles with energy technologies or a sector of the energy system. In a further step, literature on the assessment of environmental impacts of products, processes and services was evaluated, as the debate on environmental protection in an industrial society was the precursor to the concept of sustainable development. This early debate was about reducing anthropogenically induced material and energy flows through industrial society so that both the limited absorption capacity of the environmental compartments air, water, soil are not exceeded and the use of resources (raw materials, water, land) are not exhausted. In this context, a series of instruments for the quantitative environmental assessment of products and services have been developed, which both pursue a system-analytical approach and evaluate indicators for assessment via environmental modelling, which have been embedded in the concept of sustainable development and represent a part of the environmental-related sustainability indicators.

### 6.1. International and national literature on sustainable development

In the international debate on sustainable development, the UN publishes in the frame of the Programme of Work on the Development of Sustainability Indicators relevant documents, which

provide guidelines for countries. The first two sets of indicators of the UN Commission on Sustainable Development were published in 1996 and 2001 [17]. The UN commission has continued this work continuously over a period of 20 years until they published the 17 sustainable development goals (SDGs), which is a road map to ensure a world-wide progress in balance of social, environmental and economic aspects on sustainable development [18]. On this way to the different 17 SDGs, which including nearly 220 indicators, other organizations like the OECD provided important intermediate results on specific subjects like green growth or green economy within industry societies [19].

The 17 SDGs were agreed upon by developed and developing countries, but for any country they have their different meaning to build the SDGs into their national policies and sustainable strategies. In Germany, the work of the UN has been taken up by both academia and government to make substantial contributions to the extraction of sustainability indicators. The German government's National Strategy for Sustainable Development is largely based on this work [20, 21]. In the scientific context, the theoretically well-founded Integrated Concept of Sustainable Development has been used as a methodological framework for deriving sustainability indicators [22], especially in projects to monitor and navigate the transformation of the energy system in Germany [23-25]. The results of these projects provided not only a large number of indicators but also new approaches that, in the case of higher resilience of systems, gave a country valuable suggestions, especially for the design of energy supply, as to how improved resilience can be mapped by means of quantitative indicators for the entire energy system as well as for subsystems such as electricity supply [26-28].

## **6.2. International and national literature of sustainable indicators for energy supply, technologies and sectors**

Since securing energy supply is of great importance in modern industrial societies with the increase of globalisation, the composition of the mix of energy sources, taking into account both a country's dependence on imports and the technologies to be used, for example, for power generation and their potential accident risks, has triggered a scientific and societal discussion that has led to a number of important international and national publications proposing energy- and technology-related sustainability indicators. First, the applied literature sources are listed that deal with the entire energy supply or deal with subsystems [29-32]. Subsequently, the literature is cited that deals with the topic of sustainability assessment of specific electricity generation technologies. Here, the focus was particularly on the use of nuclear energy [33-35].

Of particular importance is the contribution by [31], which sums up the results of an international partnership initiative on indicators for sustainable energy development, which aims to provide an analytical tool for assessing energy production and consumption patterns at national level. The set of represented indicators was a consensus reached on this issue by five international organisations - two from the United Nations system (the Department of Economic and Social Affairs and the International Atomic Energy Agency), two from the European Union (Eurostat and the European Environment Agency) and one from the Organisation for Economic Cooperation and Development (the International Energy Agency). Building on general guidelines, the proposed national energy indicators can be used to monitor the impact of national energy policies on the social, economic and environmental aspects of sustainable development. Specifically for the environmental assessment of the impacts of energy supply, impact indicators were used for various environmental aspects such as climate change or acidification. These indicators were developed within the framework of the systems

analytical approach of life cycle assessment and reflect the current state of knowledge on the assessment of environmental aspects, which we present in detail in Chapter 5.3.

### 6.3. Literature of applied environmental indicator within the framework of Life Cycle Impact Assessment

The preservation of the natural environment and its productive capital in order to secure its existence for future generations is an important requirement in the concept of sustainable development. The preservation of the natural environment and its productive capital in order to secure its existence for future generations is an important requirement in the concept of sustainable development. The method of life cycle assessment has become established in science for the quantitative assessment of environmental technology or system consequences in the field of energy. The reasons for this are the system-analytical approach of taking into account both the entire life cycle of the object under investigation and quantifying the overall effects on the environment, including humans. In this context, the term environment is composed of four different protected environmental areas [36]. These are

- abiotic and biotic natural resources (e.g. raw materials, water, soil, flora and fauna)
- abiotic and biotic natural environment (e.g. high mountains, environmental media water, soil, air)
- human health
- abiotic and biotic cultural landscape and cultural assets

The general concept structure for environmental assessment by means of impact categories within LCA is shown in the following figure:

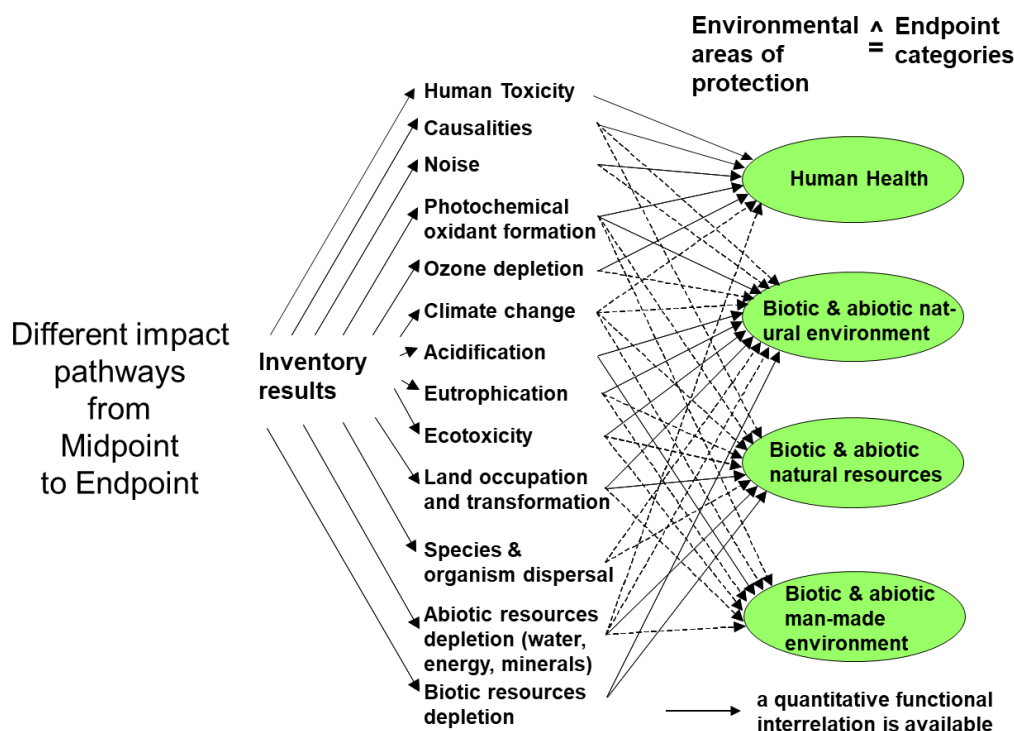

Figure 15: General structure of the Life Cycle Impact Assessment framework [36]



The aim of the concept structure is to delimit both the input- and output-related environmental influences (impact categories) into individual impact pathways, such as climate change, and to enable a functional relationship to describe the change on the basis of the environmental assets defined above. This flexible concept offers the advantage that new environmental impacts or those that could previously only be described qualitatively can be easily integrated into the structure. In addition, it takes into account the increasing knowledge about real impacts on environmental protection areas and the causal interrelationships.

When determining where along the environmental impact pathway the functional relationship for the mathematical description of the impact indicator begins, there are two different approaches, which are referred to in the Anglo-Saxon literature as the midpoint and endpoint approach [36, 37].

In the comparison of the two approaches midpoint and endpoint for quantifying the effect relationship, it remains to be noted that the endpoint approach requires a longer causal chain in the mathematical modelling. Two mechanisms of action must always be functionally linked with each other. This makes a pronounced differentiation of the damage to the individual protected areas, the endpoints, visible, but a longer causal chain is required for the mathematical description, which leads to a higher uncertainty between the causal emissions and the environmental effects to be measured with each additional chain link.

This insight was also taken up by the Joint Research Center in its recommendation of characterisation models to be used for different impact categories, which were developed in a multi-stage process on the basis of scientific criteria with the leading scientists in this field and finally published in a handbook [38]. In light of the discussion on the product environmental footprint (PEF), the characterisation model to be recommended was updated for some impact categories [39]. As a result, the updated ILCD environmental impact assessment method was given the name ILCD Midpoint 2.0. In addition, the characterisation factors for minerals and metals from van Oers were updated for the abiotic resource depletion potential, which were also adopted [40]. The ILCD method considers 16 midpoint impact categories, which cope single environmental aspects. The table 2 lists the impact categories considered, their recommended characterisation models with the associated literature sources, and the physical unit of the impact indicators.

*Table 3: Updated list of impact categories, characterisation models and impact indicators according to the ILCD Midpoint Method 2.0*

| Impact category                      | Recommended characterisation model                                                                                                      | Impact indicator and unit                                                                                            |
|--------------------------------------|-----------------------------------------------------------------------------------------------------------------------------------------|----------------------------------------------------------------------------------------------------------------------|
| Climate change                       | Base climate model at 100 years residence time from Intergovernmental Panel of Climate Change (IPCC); Status: 5th IPCC report 2013 [41] | Radiative forcing in W/m <sup>2</sup> as global warming potential (GWP 100) in CO <sub>2</sub> equivalents           |
| Stratospheric ozone depletion        | Equilibrium state model of the ozone depletion potential of world meteorological organisation (WMO); Status: WMO 1999 [42]              | Reduction of stratospheric ozone concentration as ozone depletion potential (ODP steady state) in CFC-11 equivalents |
| Human toxicity, cancerogenic effects | USEtox model; Status: Rosenbaum et al 2008 [43]                                                                                         | Comparative toxic units for humans (CTUh)                                                                            |

|                                                      |                                                                                                                                    |                                                                                                                          |
|------------------------------------------------------|------------------------------------------------------------------------------------------------------------------------------------|--------------------------------------------------------------------------------------------------------------------------|
| Human toxicity, non-cancerogenic effects             | USEtox model; Status: Rosenbaum et al 2008 [43]                                                                                    | Comparative toxic units for humans (CTUh)                                                                                |
| Ecotoxicity (freshwater)                             | USEtox model; Status: Rosenbaum et al 2008 [43]                                                                                    | Comparative toxic units for ecosystems (CTUe)                                                                            |
| Respiratory effects, inorganics/ particulate matters | RiskPoll model; Status: Rabl, A. a. Spadaro, J. 2012 [44], Greco et al 2007 [45] and Humpert 2009 [46]                             | Human intake of particulate matter in kg PM2.5 equivalents per kg particulate matter emission                            |
| Photochemical ozone formation                        | LOTOS-EUROS model; Status: van Zelm et al, 2008 as implemented in ReCiPe Midpoint [47]                                             | Increase in tropospheric ozone concentration in kg ethene equivalents                                                    |
| Acidification                                        | Accumulated exceedance of the critical acidification load value; Status: Seppälä et al 2006 [48], Posch et al 2008 [49]            | Acidification equivalents (mol H <sup>+</sup> equivalents) per year                                                      |
| Eutrophication, terrestrial                          | Accumulated exceedance of the critical load for terrestrial eutrophication; Status: Seppälä et al 2006 [48], Posch et al 2008 [49] | Eutrophication equivalents (mol N equivalents) per year                                                                  |
| Eutrophication, freshwater                           | EUTREND model; Status: Struijs et al 2009 as implemented in ReCiPe Midpoint [50]                                                   | Fraction of nutrients in freshwater (in kg P equivalents)                                                                |
| Eutrophication, marine water                         | EUTREND model; Status: Struijs et al 2009 as implemented in ReCiPe Midpoint [50]                                                   | Proportion of nutrients in marine water (in kg N equivalents)                                                            |
| Ionising radiation, human health                     | Human health effect model; Status: Frischknecht et al 2000 [51]                                                                    | Human exposure efficiency relative to kBq U235                                                                           |
| Land use                                             | Soil quality index based on LANCA; Status: Bos et al 2016 [52]                                                                     | Soil quality index in points (Biotic production, erosion resistance, mechanical filtration a. groundwater replenishment) |
| Resource use, minerals and metals                    | Abiotic resource scarcity model based on ultimate reserves; Status: van Oers et al 2020 [53]                                       | Abiotic resource depletion of minerals and metals in kg Sb equivalents                                                   |
| Resource use, fossil fuels                           | Abiotic resource scarcity model based on fossil fuels; Status: van Oers et al 2002 [54]                                            | Abiotic resource depletion of fossil fuels in MJ                                                                         |
| Freshwater Scarcity                                  | Available Water REMaining (AWARE) model, Boulay et al 2018 [55]                                                                    | User deprivation weighted water consumption in kg world equivalents deprived                                             |

As a result of the literature analysis, more than 300 sustainability indicators were available for selection. Therefore, the number of indicators had to be narrowed down on the basis of selection criteria in order to evaluate the different transformation strategies of the energy system of the examined ten energy scenarios ex-post. Based on the selection criteria listed on the left-hand side in figure 16, a reduction to 23 sustainability indicators was made. This number of 23 indicators is too comprehensive to be practical for discussions with stakeholders or for the results of a MCDA, in particular given limited (time) resources.

- Relevance to the current sust. Discussion
- Full set addresses the ecologic, economic, and social dimension of sust. and additionally takes into account system-related aspects
- All indicators have different impact mechanism of sust. development
- Future development of the indicator can be estimated satisfying with available models FRITS, PANTA RHEI, flexABLE
- It must be directionally safe concerning the measured sustainability aspect
- Depends on the development of the supply side of future technology mix

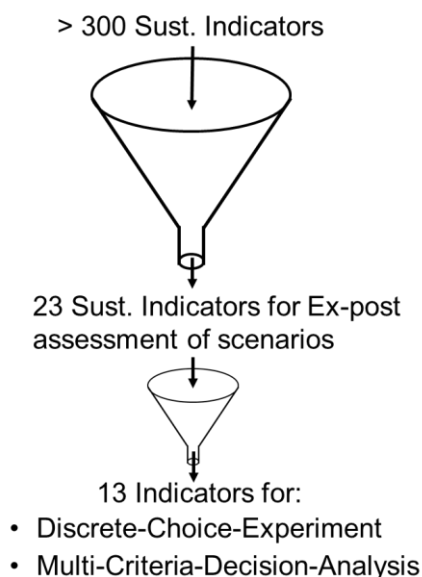

Figure 17: Complete procedure of the selection of sustainability indicators

Therefore, a sub-set of indicators had to be selected which additionally met the following criteria: Number of indicators manageable for discussions with citizens as well as the MCDA results which have to understandable for non-experts. Additionally should the selected indicators in particular relevant for the citizens' daily life as well as the reduced Sub-set of indicators still addresses ecologic, economic, technical and social dimension of sustainability.

## 7. Results for life-cycle based environmental impacts

| Indicator                                 | unit                         | 2019    | Scen I | Scen II | Scen III | Scen IV | Scen V  | Scen VI | Scen VII | Scen VIII | Scen IX | Scen X  |
|-------------------------------------------|------------------------------|---------|--------|---------|----------|---------|---------|---------|----------|-----------|---------|---------|
| CC (climate change total)                 | Mt CO <sub>2</sub> -Eq       | 895     | 306    | 310     | 313      | 285     | 348     | 314     | 199      | 228       | 197     | 357     |
| EQ (freshwater & terrestr. acidification) | 1.e6 mol H <sup>+</sup> -Eq  | 3.419   | 1.907  | 2.313   | 2.208    | 1.680   | 3.934   | 2.139   | 1.823    | 2.447     | 2.608   | 3.952   |
| EQ (freshwater ecotoxicity)               | 1.e9 CTU                     | 965     | 743    | 1.039   | 1.008    | 810     | 908     | 804     | 1.078    | 934       | 786     | 941     |
| EQ (freshwater eutrophication)            | 1.e6 kg P-Eq                 | 425     | 82     | 99      | 94       | 122     | 273     | 116     | 126      | 128       | 172     | 188     |
| EQ (marine eutrophication)                | 1.e6 kg N-Eq                 | 576     | 347    | 369     | 382      | 320     | 509     | 336     | 335      | 403       | 381     | 457     |
| EQ (terrestrial eutrophication)           | 1.e6 mol N-Eq                | 7.423   | 4.918  | 5.459   | 5.392    | 3.684   | 8.161   | 5.363   | 3.517    | 6.198     | 5.662   | 7.459   |
| HH (carcinogenic effects)                 | CTUh                         | 7.685   | 6.401  | 5.914   | 6.714    | 6.436   | 13.392  | 6.853   | 7.629    | 13.290    | 10.637  | 13.128  |
| HH (non-carcinogenic effects)             | CTUh                         | 83.603  | 62.554 | 75.656  | 88.224   | 77.897  | 125.902 | 66.301  | 78.766   | 116.817   | 87.769  | 110.649 |
| HH (ionising radiation)                   | 1.e6 kg U235-Eq              | 76.952  | 9.516  | 8.108   | 9.157    | 8.011   | 5.894   | 8.718   | 4.475    | 5.542     | 4.158   | 6.804   |
| HH (ozone layer depletion)                | kg CFC-11-Eq                 | 135.793 | 85.568 | 73.191  | 84.428   | 68.307  | 82.749  | 113.206 | 72.335   | 88.572    | 81.734  | 86.203  |
| HH (photochemical ozone creation)         | 1.e6 kg NMVOC-Eq             | 1.730   | 1.192  | 1.269   | 1.378    | 1.244   | 2.125   | 1.118   | 1.307    | 1.471     | 1.506   | 1.849   |
| HH (respiratory effects, inorganics)      | disease incidence            | 30.119  | 19.478 | 22.575  | 21.587   | 19.894  | 33.429  | 19.120  | 21.225   | 23.563    | 21.543  | 33.306  |
| RES (fossils)                             | 1.e9 MJ                      | 14.445  | 4.433  | 4.468   | 4.572    | 4.339   | 3.957   | 4.524   | 2.773    | 3.003     | 2.434   | 4.100   |
| RES (dissipated water)                    | 1.e9 m <sup>3</sup> water-Eq | 107     | 64     | 90      | 91       | 69      | 105     | 63      | 98       | 95        | 79      | 99      |
| RES (land use)                            | 1.e9 points                  | 18.616  | 18.368 | 46.155  | 42.595   | 27.478  | 18.360  | 22.864  | 28.606   | 65.453    | 14.133  | 30.311  |
| RES (minerals and metals)                 | 1.e6 kg Sb-Eq                | 65,9    | 84,1   | 80,5    | 135,7    | 107,1   | 247,8   | 159,1   | 109,8    | 224,4     | 157,3   | 206,7   |

Figure 18: Summary over all life-cycle based environmental impacts for 2019 and for all scenarios in 2050. CC: climate change, EQ: ecosystem quality, HH: human health, RES: resources

| Indicator (cumulated 2020-2050)           | unit                         | Scen I    | Scen II   | Scen III  | Scen IV   | Scen V    | Scen VI   | Scen VII  | Scen VIII | Scen IX   | Scen X    |
|-------------------------------------------|------------------------------|-----------|-----------|-----------|-----------|-----------|-----------|-----------|-----------|-----------|-----------|
| CC (climate change total)                 | Mt CO <sub>2</sub> -Eq       | 18.005    | 18.424    | 18.604    | 18.403    | 18.616    | 18.535    | 17.447    | 17.307    | 17.014    | 18.605    |
| EQ (freshwater & terrestr. acidification) | 1.e6 mol H <sup>+</sup> -Eq  | 85.086    | 92.985    | 92.861    | 81.398    | 99.399    | 84.034    | 90.072    | 93.976    | 87.791    | 102.267   |
| EQ (freshwater ecotoxicity)               | 1.e9 CTU                     | 28.995    | 35.676    | 34.548    | 29.068    | 29.662    | 29.648    | 35.012    | 31.902    | 28.451    | 30.824    |
| EQ (freshwater eutrophication)            | 1.e6 kg P-Eq                 | 6.261     | 6.682     | 6.511     | 6.776     | 8.221     | 6.403     | 7.152     | 6.777     | 7.360     | 7.124     |
| EQ (marine eutrophication)                | 1.e6 kg N-Eq                 | 14.094    | 14.573    | 14.804    | 13.882    | 15.236    | 13.643    | 14.702    | 14.565    | 14.112    | 14.795    |
| EQ (terrestrial eutrophication)           | 1.e6 mol N-Eq                | 194.684   | 200.987   | 203.753   | 178.411   | 200.944   | 177.930   | 184.165   | 206.273   | 183.460   | 212.303   |
| HH (carcinogenic effects)                 | CTUh                         | 232.457   | 234.721   | 241.684   | 234.772   | 300.734   | 240.545   | 271.041   | 295.004   | 279.857   | 302.374   |
| HH (non-carcinogenic effects)             | CTUh                         | 2.377.776 | 2.571.669 | 2.748.772 | 2.553.821 | 2.932.732 | 2.340.779 | 2.723.663 | 2.904.470 | 2.620.740 | 2.798.402 |
| HH (ionising radiation)                   | 1.e6 kg U235-Eq              | 749.404   | 741.774   | 754.842   | 742.672   | 734.518   | 766.292   | 728.758   | 726.978   | 716.185   | 743.755   |
| HH (ozone layer depletion)                | kg CFC-11-Eq                 | 3.664.432 | 3.512.506 | 3.587.731 | 3.418.644 | 3.883.709 | 4.234.069 | 3.644.773 | 3.759.579 | 3.952.557 | 3.874.548 |
| HH (photochemical ozone creation)         | 1.e6 kg NMVOC-Eq             | 45.520    | 47.246    | 48.724    | 46.590    | 52.029    | 44.428    | 49.106    | 48.250    | 47.150    | 49.420    |
| HH (respiratory effects, inorganics)      | disease incidence            | 802.741   | 860.118   | 847.090   | 791.918   | 863.230   | 752.504   | 856.718   | 840.477   | 785.001   | 889.309   |
| RES (fossils)                             | 1.e9 MJ                      | 275.432   | 281.656   | 285.472   | 283.327   | 278.837   | 284.965   | 266.611   | 264.854   | 258.138   | 278.552   |
| RES (dissipated water)                    | 1.e9 m <sup>3</sup> water-Eq | 2.671     | 3.264     | 3.281     | 2.741     | 2.936     | 2.585     | 3.351     | 3.117     | 2.708     | 3.015     |
| RES (land use)                            | 1.e9 points                  | 618.995   | 798.092   | 844.385   | 674.825   | 549.621   | 570.449   | 759.538   | 925.216   | 527.662   | 670.436   |
| RES (minerals and metals)                 | 1.e6 kg Sb-Eq                | 2.568     | 2.659     | 3.260     | 2.845     | 4.501     | 3.535     | 3.098     | 4.508     | 3.555     | 4.046     |

Figure 19: Summary of life cycle based environmental impacts (cumulated 2020-2050) for all ten scenarios. CC: climate change, EQ: ecosystem quality, HH: human health, RES: resources

More details on the life cycle-based environmental impacts can be found on the project website: <https://www.innosys-projekt.de>

## 8. Results for total system costs

Total system costs comprise the following components:

- Annuities for investment in new technologies (calculated with a uniform interest rate of 6%)
- fixed O&M costs
- variable O&M costs (fuel costs, costs for CO<sub>2</sub> emission certificates)

for all power, heat, synfuel and biofuel generation technologies. For the transport sector, only fuel costs are taken into account. An overview of the development of the total system costs is given in Figure 20.

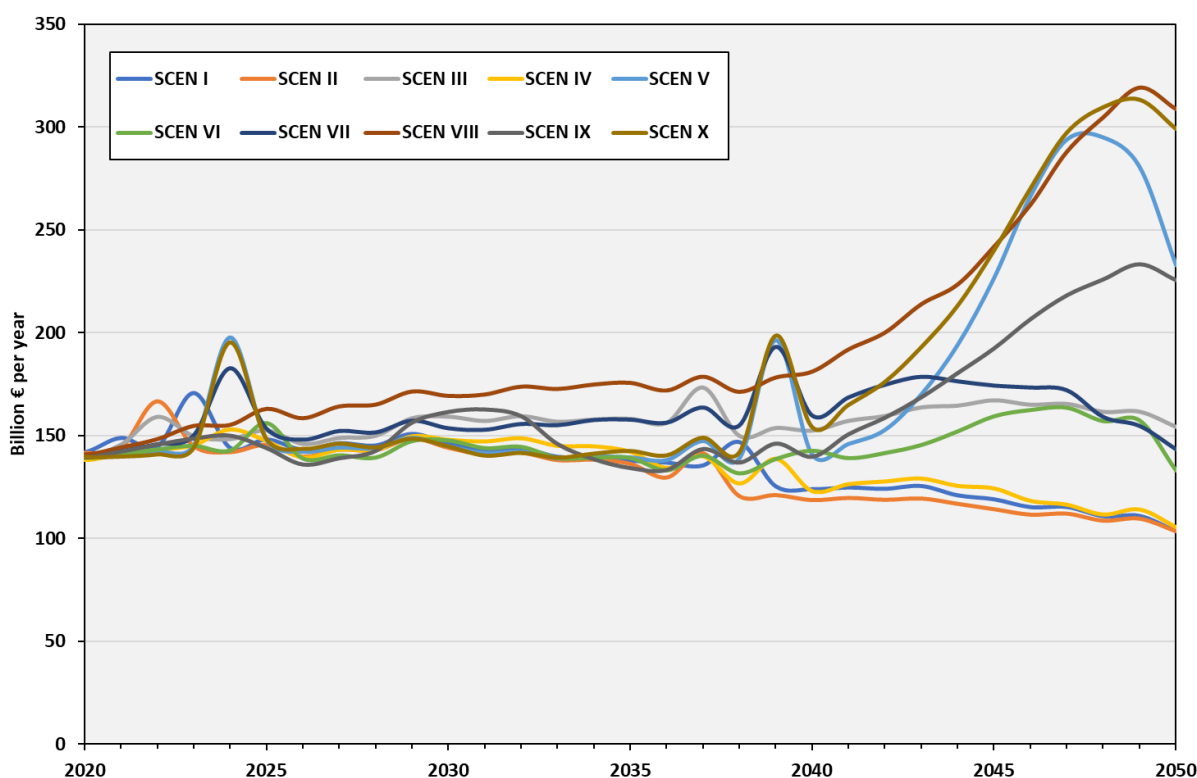

Figure 20: Total system costs in the selected scenarios

## 9. Results for indicator “diversity of power supply”

In order to measure diversity of generation technologies, criteria related to the physical plant, the fuel used, the generation characteristics of the plant, and its environmental and social effects are considered. However, environmental effects, social effects, and some economic effects are considered in the broader MCDA of which the diversity measurement is itself only one criteria, so these were excluded from the diversity measurements.

For the physical plant, the average plant lifetime and average plant capacity (based on [56]) and the average lifetime (derived from [57-63]) were considered. To describe diversity between fuels, its sourcing was measured as the proportion of fuel imported, and nations providing imported fuel [64, 65]. To describe diversity between generation capabilities, we derived seven criteria, sourced . We derived four criteria from empirical generation data for the five years from the SMARD database over the period 2015-2019 [66]. The first criterion was the correlation of the average daily generation curve for each energy source with the average daily demand, with timesteps of 15 minutes. The second criterion was again the correlation of average generation with average demand, but calculated for average cumulative daily generation and demand over the course of the year. These two criteria measure the usability of power generated by each plant. Next, we measured the self-correlation of the generation data, at time offsets of a day and a year. As in the previous criterion, the daily data was calculated with a sample period of 15 minutes, and the annual data was calculated using cumulative daily generation. These two criteria measure the “predictability” or “reliability” of power generation from each source. All four correlations were calculated with the Pearson correlation coefficient. Additionally, some indicators were chosen to describe the plant’s flexibility: ramping ability, or maximum rate of change of power generation; minimum operable load; and capacity factor, or the average percentage of rated capacity generated (based on [67-69]). Together, these seven criteria give a well-rounded, quantified image of the predictability, usability, and flexibility of the energy sources. Finally, we included two economic criteria which were not considered in the larger MCDA. The first was the market concentration of suppliers, which was calculated with the Herfindahl-Hirschman Index from a list of all German power plants (based on [56]). Finally, we incorporated a criterion based on the requirements of each energy source for critical raw materials. The EU lists 30 such critical raw materials, which hold potential supply chain risks in the future [70]. We chose to measure the total number of critical raw materials required for each energy source, blind to quantities, because of the lack of reliable data on the quantities of each material required, and the lack of a simple measure to aggregate a comparison of material requirements which varied by several orders of magnitudes. These material requirements were drawn from a number of studies [71-76].

Each criterion was normalized by dividing it by the maximum value obtained by any energy source. An equal weight was assigned to each criterion, except for the two criteria on correlation of power supply and demand. These were the only criteria with a negative range; therefore, they were assigned a weight half that of the others, to account for the larger range.



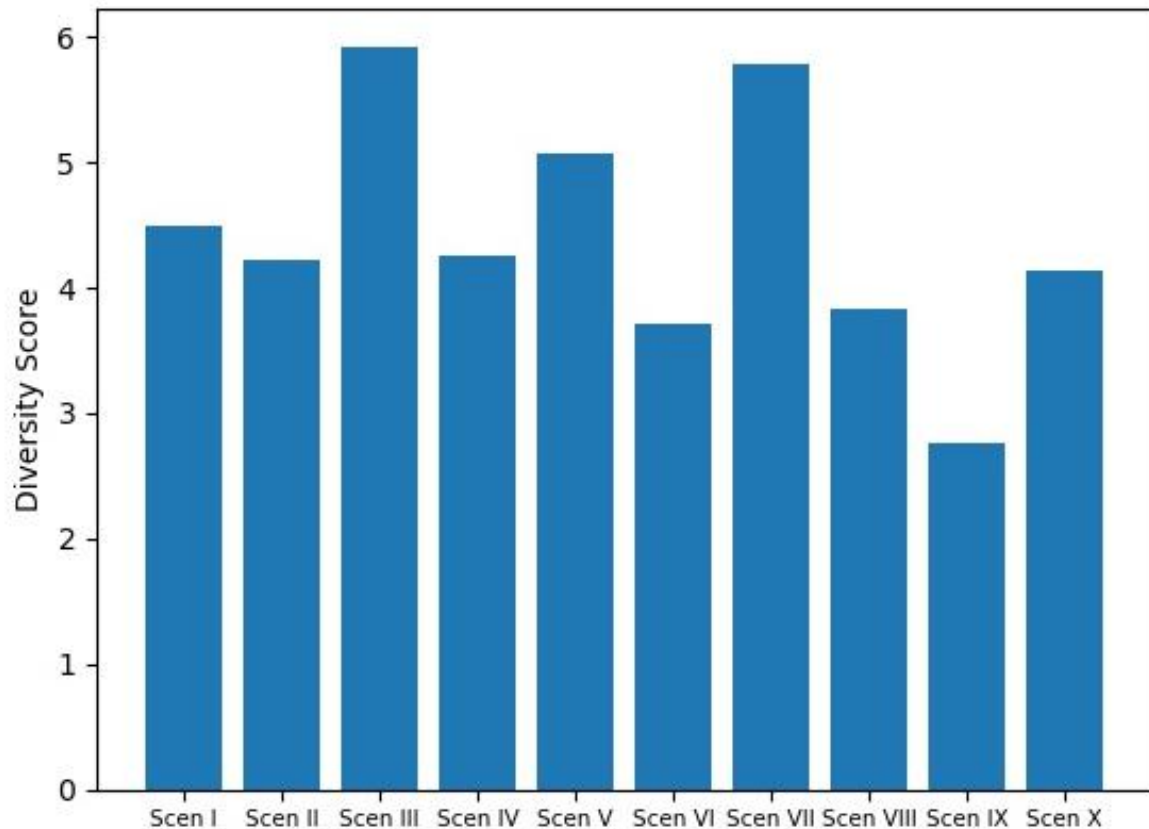

Figure 21: Diversity scores of all scenarios

Most scenarios receive a score of close to 4. There are four outliers: Scenarios 3, 5, and 7 have much higher diversity, and Scenario 9 has much lower diversity. Examination of the composition of those scenarios shows that Scenarios 3, 5, and 7 have higher proportions of conventional power, whereas all others are almost entirely renewable; this results in a higher diversity score. In contrast, Scenario 9 consists of nearly 75% photovoltaic, which explains its low diversity score.

## 10. Original quotations from the focus groups

Original quotations from the focus groups. As the groups were conducted in German, the quotes have been translated. References within transcripts in brackets.

A1: *“That’s why I say on the one hand »security of supply« and on the other hand »affordability«. Because I can’t say we’re all going to be unemployed, but because we’re doing all this with renewable energies, everything is going to be even more expensive. For this we need a concept that society can afford.”* [#01:43:11-2].

A2: *„Hard to assess ... On the one hand I find the other points [speaker refers to ecologic outcomes of energy production] more important than the costs, however, it is true in terms of social justice that if the generation costs are so high ... someone has to bear them and that will have a negative effect.”* [#01:43:42-1].

A3: *“The most important thing for me would be the security of supply and the jobs, because that would create satisfaction among the population and that is a basic building block for establishing something like that [refers to the green energy technologies] and making it available. So, if people realize it works and I’m not out of a job.”* [#01:35:12-9]

A4: *“One important source of energy I have not found here and that is simply the human: The bicycle instead of the car. The renunciation of 25 degrees in the bathroom and floor heating. All the things that you could save by being aware of what you consume, keyword renunciation.”* [#00:43:27-6].

A5: *“It’s only on this point of quality of life that I think our society has often tended to say, »everybody must do this, and everybody must not do that«. And that’s what I find interesting, that every other point-of-view...how do you deal with it? Because one person can do without this and another person can do without that. I haven’t used a TV for two years, I’m fine with it.”* [#01:19:30-4].

A6: *“I’d check all technologies on their effects on human health and climate change and maybe the security of supply. But all the rest...what’s the use if I have few costs but the climate or my health is down the drain? [...]”* [#01:48:07-0].

A7: *„I find it hard to relay on the costs for power generation, because there’s no guarantee that it will stay the same. Will it always be more expensive, or is that only valid for the first few years until maybe innovation kicks in and makes it way cheaper? For me that’s hard to assess.”* [ #01:43:11-1].

## **11. Harmonization of indicators and final weighting factors for MCDA**

For MCDA results from impact assessment and discrete choice experiment (DCE) have to be matched since indicator sets differs slightly. For DCE aggregated indicators for human health and resources were applied and preferences were generated. Those preference values must be adapted to be used as weights for MCDA. The following table shows the steps of the applied procedure.

At first, the  $\beta$ -coefficient retrieved from DCE is normalized to 1. Then aggregated  $\beta$ -coefficients for human health and resources are disaggregated applying the weighting scheme provided by [77]. The disaggregated  $\beta$ -coefficients are multiplied with a robustness factor according to [77] to take into account that the methods used to survey (environmental) impacts vary in validity. The robustness of the indicators “unemployment rate”, “resilience”, and “system costs” were assessed by expert judgement within the project team. Those intermediate coefficients are finally again normalized to 1 to get the final weighting factors for MCDA.

Table 4: Harmonization of indicators and final weighting factors for WSM

| Discrete-choice indicator           | Integrated assessment indicator | $\beta$ -coefficient | $\beta$ -coefficient normalized | weighting factor (public) according to [77] | $\beta$ -coefficient, norm., disaggregated | Robustness factor according to [77] | Intermediate Coefficients | Final weighting factors (incl. Robustness) |
|-------------------------------------|---------------------------------|----------------------|---------------------------------|---------------------------------------------|--------------------------------------------|-------------------------------------|---------------------------|--------------------------------------------|
|                                     |                                 |                      | scaled to 1                     |                                             | A                                          | B'                                  | C=A*B                     | scaled to 1                                |
| Climate change                      |                                 | 0.0582               | 0.318                           |                                             | 0.318                                      | 1                                   | 0.318                     | 0.532                                      |
| Human Health                        |                                 | 0.0252               | 0.138                           |                                             |                                            |                                     |                           |                                            |
|                                     | Ozone layer depletion           |                      |                                 | 5.29                                        | 0.022                                      | 1                                   | 0.022                     | 0.037                                      |
|                                     | Carcinogenic effects            |                      |                                 | 7.24                                        | 0.030                                      | 0.4                                 | 0.012                     | 0.020                                      |
|                                     | Non-carcinogenic effects        |                      |                                 | 5.74                                        | 0.024                                      | 0.4                                 | 0.010                     | 0.016                                      |
|                                     | Respiratory effects,            |                      |                                 | 5.18                                        | 0.022                                      | 1                                   | 0.022                     | 0.036                                      |
|                                     | Ionizing radiation              |                      |                                 | 5.13                                        | 0.021                                      | 0.6                                 | 0.013                     | 0.021                                      |
|                                     | Photochemical ozone creation    |                      |                                 | 4.44                                        | 0.019                                      | 0.6                                 | 0.011                     | 0.019                                      |
| Resources, land use                 |                                 | 0.0189               | 0.104                           |                                             | 0.104                                      | 0.2                                 | 0.021                     | 0.035                                      |
| Resources, mineral, metals, fossils |                                 | 0.0299               | 0.164                           |                                             |                                            |                                     |                           |                                            |
|                                     | Resources, mineral and metals   |                      |                                 | 5.57                                        | 0.074                                      | 0.2                                 | 0.015                     | 0.025                                      |
|                                     | Resources, fossils              |                      |                                 | 6.75                                        | 0.090                                      | 0.2                                 | 0.018                     | 0.030                                      |
| System costs                        |                                 | 0.0138               | 0.076                           |                                             | 0.076                                      | 0.7*                                | 0.053                     | 0.088                                      |
| Security of supply                  | Diversity                       | 0.0229               | 0.125                           |                                             | 0.125                                      | 0.25*                               | 0.031                     | 0.052                                      |
| Employment                          | Unemployment rate               | 0.0137               | 0.075                           |                                             | 0.075                                      | 0.7*                                | 0.053                     | 0.088                                      |
|                                     |                                 |                      | 1                               |                                             | 1                                          |                                     |                           | 1                                          |

\* Expert judgement since indicators are not covered by [77]

Table 5: Overview of indicator values used in the MCDA

|                                                     |      | SCEN I   | SCEN II  | SCEN III | SCEN IV  | SCEN V   | SCEN VI  | SCEN VII | SCEN VIII | SCEN IX  | SCEN X   |
|-----------------------------------------------------|------|----------|----------|----------|----------|----------|----------|----------|-----------|----------|----------|
| Unemployment rate [%]                               | 2050 | 5.69     | 5.69     | 5.71     | 5.62     | 5.60     | 5.51     | 5.20     | 5.45      | 4.97     | 5.96     |
| Diversity (SI) [-]                                  | 2050 | 4.48     | 4.22     | 5.96     | 4.25     | 5.01     | 3.68     | 5.81     | 3.82      | 2.76     | 4.12     |
| System costs [€]                                    | cum  | 4.03E+12 | 3.93E+12 | 4.71E+12 | 4.04E+12 | 4.34E+12 | 4.82E+12 | 5.89E+12 | 4.87E+12  | 5.22E+12 | 5.46E+12 |
| Climate change [kg CO <sub>2</sub> -Eq]             | cum  | 1.79E+13 | 1.84E+13 | 1.85E+13 | 1.85E+13 | 1.85E+13 | 1.75E+13 | 1.74E+13 | 1.69E+13  | 1.86E+13 | 1.87E+13 |
| Carcinogenic effects [CTUh]                         | cum  | 3.08E+05 | 3.11E+05 | 3.15E+05 | 3.19E+05 | 3.16E+05 | 3.51E+05 | 3.73E+05 | 3.50E+05  | 3.80E+05 | 3.82E+05 |
| Ionizing radiation [kg U235-Eq]                     | cum  | 6.83E+11 | 6.78E+11 | 6.82E+11 | 6.86E+11 | 7.05E+11 | 6.66E+11 | 6.55E+11 | 6.53E+11  | 6.73E+11 | 6.85E+11 |
| Non-carcinogenic effects [CTUh]                     | cum  | 2.68E+06 | 2.97E+06 | 3.06E+06 | 3.08E+06 | 2.66E+06 | 3.16E+06 | 3.30E+06 | 2.93E+06  | 3.31E+06 | 3.24E+06 |
| Ozone layer depletion [kg CFC-11-Eq]                | cum  | 3.53E+06 | 3.39E+06 | 3.79E+06 | 3.33E+06 | 4.25E+06 | 3.53E+06 | 4.65E+06 | 3.83E+06  | 3.92E+06 | 4.12E+06 |
| Photochemical ozone creation [kg NMVOC-Eq]          | cum  | 4.76E+10 | 4.98E+10 | 5.08E+10 | 4.99E+10 | 4.67E+10 | 5.20E+10 | 5.12E+10 | 4.91E+10  | 5.46E+10 | 5.24E+10 |
| Respiratory effects, inorganics [desease incidence] | cum  | 8.33E+05 | 8.98E+05 | 8.80E+05 | 8.41E+05 | 7.85E+05 | 8.99E+05 | 8.87E+05 | 8.14E+05  | 9.02E+05 | 9.34E+05 |
| Resources, fossils [MJ]                             | cum  | 2.68E+14 | 2.76E+14 | 2.77E+14 | 2.80E+14 | 2.79E+14 | 2.61E+14 | 2.58E+14 | 2.51E+14  | 2.74E+14 | 2.75E+14 |
| Resources, land use [points]                        | cum  | 6.08E+14 | 7.89E+14 | 8.34E+14 | 6.68E+14 | 5.60E+14 | 7.52E+14 | 9.17E+14 | 5.17E+14  | 5.41E+14 | 6.63E+14 |
| Resources, minerals and metals [kg Sb-Eq]           | cum  | 3.12E+09 | 3.51E+09 | 4.97E+09 | 4.00E+09 | 4.53E+09 | 4.06E+09 | 8.61E+09 | 4.16E+09  | 5.70E+09 | 6.07E+09 |

## 12. References for Supplement

1. Schlenzig, C., *Energy planning and environmental management with the information and decision support system MESAP*. 1999. **12**(1-6): p. 81-91.
2. Krewitt, W., et al., *Energy [R]evolution 2008—a sustainable world energy perspective*. Energy Policy, 2009. **37**(12): p. 5764-5775.
3. Teske, S., et al., *Energy [R]evolution 2010—a sustainable world energy outlook*. Energy Efficiency, 2011. **4**(3): p. 409-433.
4. Teske, S., et al., *Achieving the Paris Climate Agreement Goals - Global and Regional 100% Renewable Energy Scenarios with Non-energy GHG Pathways for +1.5°C and +2°C*, ed. S. Teske. 2019: Springer International Publishing.
5. Teske, S., et al., *High renewable energy penetration scenarios and their implications for urban energy and transport systems*. Current Opinion in Environmental Sustainability, 2018. **30**: p. 89-102.
6. Pregger, T., et al., *Moving towards socio-technical scenarios of the German energy transition—lessons learned from integrated energy scenario building*. Climatic Change, 2020. **162**(4): p. 1743-1762.
7. Lutz, C., et al., *Gesamtwirtschaftliche Effekte der Energiewende*. 2018, GWS, DLR, Prognos, DIW Berlin.
8. Kraftfahrbundesamt. *Entwicklungen der Fahrleistungen nach Fahrzeugarten seit 2015*. 2021; Available from: [https://www.kba.de/DE/Statistik/Kraftverkehr/VerkehrKilometer/vk\\_inlaenderfahrleistung/vk\\_inlaenderfahrleistung\\_inhalt.html](https://www.kba.de/DE/Statistik/Kraftverkehr/VerkehrKilometer/vk_inlaenderfahrleistung/vk_inlaenderfahrleistung_inhalt.html).
9. Qussous, R., T. Künzel, and A. Weidlich, *Effects of a Coal Phase-Out on Market Dynamics: Results from a Simulation Model for Germany*. 2019.
10. Ahlert, G., et al., *Das IAB/INFORGE-Modell*. 2009. p. 15-175.
11. Zika, G., et al., *BMAS-Prognose "Digitalisierte Arbeitswelt"*. 2019, Institut für Arbeitsmarkt- und Berufsforschung (IAB), Nürnberg, Germany, ), Bundesinstitut für Berufsbildung (BIBB), Gesellschaft für Wirtschaftliche Strukturforchung (GWS) mbH.
12. Wolter, M.I., et al., *Wirtschaft 4.0 und die Folgen für Arbeitsmarkt und Ökonomie - Szenario-Rechnungen im Rahmen der fünften Welle der BIBB-IAB-Qualifikations- und Berufsprojektionen*, in *Wissenschaftliche Diskussionspapiere*. 2019.
13. Maier, T., A. Mönnig, and G. Zika, *Labour demand in Germany by industrial sector, occupational field and qualification until 2025 - model calculations using the IAB/ INFORGE model*. Economic Systems Research, 2015. **27**.
14. Lehr, U., et al., *Beschäftigungschancen auf dem Weg zu einer Green Economy - szenarienbasierte Analyse von (Netto-)Beschäftigungswirkungen*. 2019, GWS, DIW Berlin.
15. Lutz, C., et al., *Sozioökonomische Szenarien als Grundlage der Vulnerabilitätsanalysen für Deutschland - Teilbericht des Vorhabens "Politikinstrumente zur Klimaanpassung"*, in *Climate Change*. 2019, Gesellschaft für Wirtschaftliche Strukturforchung (GWS), Osnabrück, Germany.
16. Junne, T., et al., *Environmental Sustainability Assessment of Multi-Sectoral Energy Transformation Pathways: Methodological Approach and Case Study for Germany*. Sustainability, 2020. **12**(19): p. 8225.
17. UN Department of Economic and Social Affairs. *Indicators of Sustainable Development: Guidelines and Methodologies*. 2007 17.03.2021]; Available from: <https://sustainabledevelopment.un.org/content/documents/guidelines.pdf>.
18. United Nations. *The sustainable development goals report 2016*. 2016 17.03.2021]; Available from: <https://unstats.un.org/sdgs/report/2016/The%20Sustainable%20Development%20Goals%20Report%202016.pdf>.
19. OECD (Organisation for Economic Co-operation and Development). *Towards Green Growth: Monitoring Progress: OECD Indicators*. 2011 17.03.2021]; Available from: <http://www.oecd.org/greengrowth/48224574.pdf>.
20. Bundesregierung, D. *10 Jahre Nachhaltigkeit „made in Germany“: Die Nationale Strategie für eine nachhaltige Entwicklung*. 2012 17.03.2021]; Available from:



- <https://www.bundesregierung.de/resource/blob/975274/388826/b6d6406a5aac71c04d7433da38845faa/2012-05-09-kurzpapier-zum-fortschrittsbericht-2012-barrierefrei-data.pdf?download=1>.
21. Federal Government of Germany, *German Sustainable Development Strategy - New Version 2016*. 2018, Presse- und Informationsamt der Bundesregierung.
  22. Kopfmüller, J., et al., *Nachhaltige Entwicklung integrativ betrachtet: Konstitutive Elemente, Regeln, Indikatoren*. Global zukunftsfähige Entwicklung. 2001, Berlin: Ed. Sigma. 432.
  23. Rösch, C., et al., *Indicator-based sustainability assessment of the German Energy System and its transition*. 2018, Karlsruhe: KIT Scientific Publishing. 174.
  24. Quitzow, R., et al. *Multikriterieller Bewertungsansatz für eine nachhaltige Energiewende. Von der Analyse zur Entscheidungsfindung mit ENavi*. 2018 22.03.2021; Available from: [https://publications.iass-potsdam.de/rest/items/item\\_3458890\\_10/component/file\\_3537888/content](https://publications.iass-potsdam.de/rest/items/item_3458890_10/component/file_3537888/content).
  25. German Federal Ministry for Economic Affairs and Energy (BMWi). *Sixth "Energy Transition" Monitoring Report The Energy of the Future: Reporting Year 2016*. 2018 17.03.2021; Available from: [https://www.bmwi.de/Redaktion/EN/Publikationen/Energie/sechster-monitoring-bericht-zur-energiewende-langfassung.pdf?\\_\\_blob=publicationFile&v=6](https://www.bmwi.de/Redaktion/EN/Publikationen/Energie/sechster-monitoring-bericht-zur-energiewende-langfassung.pdf?__blob=publicationFile&v=6).
  26. Gleich, A.v., et al., *Resilienz als Leitkonzept – Vulnerabilität als analytische Kategorie*, in *Theoretische Grundlagen für Klimaanpassungsstrategien. Projekt nordwest2050, Bericht Teil 1.*, K. Fichter, et al., Editors. 2010: Bremen/Oldenburg, Germany.
  27. Stirling, A., *A general framework for analysing diversity in science, technology and society*. 2007. **4**(15): p. 707–719.
  28. Stirling, A., *Multicriteria diversity analysis: A novel heuristic framework for appraising energy portfolios*. *Energy Policy*, 2010. **38**(4): p. 1622-1634.
  29. Enquete-Kommission Nachhaltige Energieversorgung unter den Bedingungen der Globalisierung und der Liberalisierung. *Erster Bericht: Nachhaltige Energieversorgung auf liberalisierten und globalisierten Märkten: Bestandsaufnahme und Ansatzpunkte*. 2001 17.03.2021; Available from: <http://dip21.bundestag.de/dip21/btd/14/075/1407509.pdf>.
  30. Iaea, et al., *Energy indicators for sustainable development: guidelines and methodologies*. 2004.
  31. Vera, I. and L. Langlois, *Energy indicators for sustainable development*. 2007. **32**(6): p. 875–882.
  32. Hirschberg, S., et al., *Final set of sustainability criteria and indicators for assessment of electricity supply options*. 2008.
  33. Internationale Länderkommission Kerntechnik (ILK). *Bewertung der Nachhaltigkeit der Kernenergie und anderer Technologien zur Stromerzeugung*. 2004 17.03.2021; Available from: [https://umwelt-online.de/regelwerk/energie/laender/he/ilk16\\_ges.htm](https://umwelt-online.de/regelwerk/energie/laender/he/ilk16_ges.htm).
  34. Lensa, W.v., ed. *RED-IMPACT: Impact of partitioning, transmutation and waste reduction technologies on the final nuclear waste disposal ; synthesis report*. Schriften des Forschungszentrums Jülich : [...], Reihe Energie & Umwelt. 2008, Forschungszentrum, Zentralbibliothek: Jülich. 178.
  35. Stamford, L. and A. Azapagic, *Sustainability indicators for the assessment of nuclear power*. 2011. **36**(10): p. 6037–6057.
  36. Joliet, O., et al., *The LCIA midpoint-damage framework of the UNEP/SETAC life cycle initiative*. 2004. **9**(6).
  37. Bare, J.C., et al., *Midpoints versus endpoints: The sacrifices and benefits*. 2000. **5**(6).
  38. European Commission Joint Research Centre (JRC), *International Reference Life Cycle Data System (ILCD) Handbook: Recommendations for Life Cycle Impact assessment in the European context – based on existing environmental impact assessment models and factors*. 2011, Ispra, Italy.
  39. Fazio, S., et al., *Supporting information to the characterisation factors of the recommended EF Life Cycle Impact Assessment method - new models and differences with ILCD*, in *JRC Technical Reports*. 2018, JRC.
  40. van Oers, L., J.B. Guinée, and R. Heijungs, *Abiotic resource depletion potentials (ADPs) for elements revisited – updating ultimate reserve estimates and introducing time series for production data*. *The International Journal of Life Cycle Assessment*, 2020. **25**(2): p. 294-308.

41. IPCC (Intergovernmental Panel on Climate Change), *Climate Change 2014: Synthesis Report - Contribution of Working Groups I, II and III to the Fifth Assessment Report of the Intergovernmental Panel on Climate Change*. 2014.
42. World Meteorological Organisation, *Scientific assessment of ozone depletion: 1998*. Report / World Meteorological Organization, Global Ozone Research and Monitoring Project. 1999, Geneva, Switzerland: World Meteorological Organization. 650.
43. Rosenbaum, R.K., et al., *USEtox—the UNEP-SETAC toxicity model: recommended characterisation factors for human toxicity and freshwater ecotoxicity in life cycle impact assessment*. 2008. **13**(7): p. 532–546.
44. Rabl, A. and J.V. Spaduro. *The RiskPoll software, version is 1.051*. 2012 19.03.2021]; Available from: <http://arirabl.org/software/>.
45. Greco, S.L., et al., *Spatial patterns of mobile source particulate matter emissions-to-exposure relationships across the United States*. 2007. **41**(5): p. 1011–1025.
46. Humpert, S. *Geographically Differentiated Life-cycle Impact Assessment of Human Health*. 2009 19.03.2021]; Available from: [https://digitalassets.lib.berkeley.edu/etd/ucb/text/Humbert\\_berkeley\\_0028E\\_10265.pdf](https://digitalassets.lib.berkeley.edu/etd/ucb/text/Humbert_berkeley_0028E_10265.pdf).
47. van Zelm, R., et al., *European characterization factors for human health damage of PM10 and ozone in life cycle impact assessment*. 2008. **42**(3): p. 441–453.
48. Seppälä, J., et al., *Country-dependent Characterisation Factors for Acidification and Terrestrial Eutrophication Based on Accumulated Exceedance as an Impact Category Indicator (14 pp)*. 2006. **11**(6): p. 403–416.
49. Posch, M., et al., *The role of atmospheric dispersion models and ecosystem sensitivity in the determination of characterisation factors for acidifying and eutrophying emissions in LCIA*. 2008. **13**(6): p. 477–486.
50. Struijs, J., et al., *Aquatic Eutrophication*. Chapter 6, in Goedkoop, Mark; Heijungs, Reinout.; Huijbregts, Mark A. J.; De Schryver, An; Struijs, Jaap; van Zelm. Rosalie. ReCiPE 2008. *A life cycle impact assessment method which comprises harmonised category indicators at the midpoint and the endpoint level*. Report I: Characterisation Factors. 2008.
51. Frischknecht, R., et al., *Human health damages due to ionising radiation in life cycle impact assessment*. 2000. **20**(2): p. 159–189.
52. Bos, U., et al., *LANCA. Characterization Factors for Life Cycle Impact Assessment, Version 2.0*. 2016, Stuttgart: Fraunhofer Verlag.
53. van Oers, L., J.B. Guinée, and R. Heijungs, *Abiotic resource depletion potentials (ADPs) for elements revisited—updating ultimate reserve estimates and introducing time series for production data*. 2020. **25**(2): p. 294–308.
54. van Oers, L., et al. *Abiotic resource depletion in LCA. Improving characterisation factors from abiotic depletion as recommended in the new Dutch LCA Handbook*. 2002 22.03.2021]; Available from: [https://www.leidenuniv.nl/cml/ssp/projects/lca2/report\\_abiotic\\_depletion\\_web.pdf](https://www.leidenuniv.nl/cml/ssp/projects/lca2/report_abiotic_depletion_web.pdf).
55. Boulay, A.-M., et al., *The WULCA consensus characterization model for water scarcity footprints: assessing impacts of water consumption based on available water remaining (AWARE)*. 2018. **23**(2): p. 368–378.
56. Bundesnetzagentur, *Power Plant List*, Bundesnetzagentur, Editor. 2020.
57. Matthes, F., et al., *Germany's Electric Future*. 2017.
58. Staffell, I., et al., *The role of hydrogen and fuel cells in the global energy system*. *Energy & Environmental Science*, 2019. **12**(2): p. 463–491.
59. IRENA, *Hydropower*, in *Renewable energy technologies: Cost analysis series*, IRENA, Editor. 2012, IRENA.
60. Wirth, H., *Recent Facts about Photovoltaics in Germany*. 2020, FhG ISE, Freiburg, Germany.
61. Kost, C., et al., *Levelized cost of electricity renewable energy technologies*. 2018, FhG ISE, Freiburg, Germany.
62. Ziegler, L., et al., *Lifetime extension of onshore wind turbines: A review covering Germany, Spain, Denmark, and the UK*. *Renewable and Sustainable Energy Reviews*, 2018. **82**: p. 1261–1271.

63. Markewitz, P., M. Robinius, and D. Stolten, *The Future of Fossil Fired Power Plants in Germany—A Lifetime Analysis*. Energies, 2018. **11**: p. 1616.
64. (NEA), Nuclear Energy A. and International Atomic Energy A. (IAEA), *Uranium 2020: Resources, Production and Demand*. 2021: OECD Publishing, Paris, France.
65. Flach, B., S. Lieberz, and S. Bolla, *EU Biofuels Annual 2019*. 2019, USDA Foreign Agricultural Service.
66. Bundesnetzagentur, *SMARD - Strommarktdaten*, Bundesnetzagentur, Editor. 2020.
67. DEA (Danish Energy Agency), *Data sheet for electricity and district heat production - updated April 2020*. 2020.
68. Gonzalez-Salazar, M.A., T. Kirsten, and L. Prchlik, *Review of the operational flexibility and emissions of gas- and coal-fired power plants in a future with growing renewables*. Renewable and Sustainable Energy Reviews, 2018. **82**: p. 1497-1513.
69. Saur, G., et al., *Stationary Fuel Cell Evaluation*. 2016, National Renewable Energy Laboratory (NREL).
70. Blengini, G.A., et al., *Study on the EU's list of Critical Raw Materials - Executive Summary*. 2020, European Commission.
71. Basosi, R., et al., *Life Cycle Analysis of a Geothermal Power Plant: Comparison of the Environmental Performance with Other Renewable Energy Systems*. 2020. **12**(7): p. 2786.
72. Carrara, S., et al., *Raw materials demand for wind and solar PV technologies in the transition towards a decarbonised energy system*. 2020.
73. Spath, P.L., M.K. Mann, and D.R. Kerr, *Life Cycle Assessment of Coal-fired Power Production*. 1999, National Renewable Energy Laboratory (NREL).
74. Moss, R., et al., *Critical metals in the path towards the decarbonisation of the EU energy sector Assessing rare metals as supply-chain bottlenecks in low-carbon energy technologies*. 2013, Joint Research Center (JRC).
75. Spath, P.L. and M.K. Mann, *Life Cycle Assessment of a Natural Gas Combined-Cycle Power Generation System*. 2000, National Renewable Energy Laboratory (NREL).
76. Mann, M.K. and P.L. Spath, *Life Cycle Assessment of a Biomass Gasification Combined-Cycle System*. 1997, National Renewable Energy Laboratory (NREL).
77. Sala, S., A. Cerutti, and R. Pant, *Development of a weighting approach for the Environmental Footprint in JRC Technical Reports*. 2017, JRC.
